1 **Interactions of cytosolic termini of the Jen1**  
2 **monocarboxylate transporter are critical for trafficking,**  
3 **transport activity and endocytosis**

4

5 **Cláudia Barata-Antunes<sup>1,2\*</sup>, Gabriel Talaia<sup>1,3\*</sup>, George Broutzakis<sup>4</sup>, David Ribas<sup>1</sup>,**  
6 **Pieter De Beule<sup>5</sup>, Margarida Casal<sup>1,2</sup>, Christopher J. Stefan<sup>6</sup>, George Diallinas<sup>4,7\*</sup>**  
7 **and Sandra Paiva<sup>1,2\*</sup>**

8

9 <sup>1</sup>Centre of Molecular and Environmental Biology, Department of Biology, University  
10 of Minho, Braga, Portugal

11 <sup>2</sup>Institute of Science and Innovation for Bio-Sustainability (IB-S), University of Minho,  
12 Portugal

13 <sup>3</sup>Department of Cell Biology, Yale University School of Medicine, New Haven, CT,  
14 USA

15 <sup>4</sup>Department of Biology, National and Kapodistrian University of Athens,  
16 Panepistimiopolis 15784, Athens, Greece.

17 <sup>5</sup>International Iberian Nanotechnology Laboratory, Avenida Mestre José Veiga s/n,  
18 Braga, Portugal

19 <sup>6</sup>MRC Laboratory for Molecular Cell Biology, University College London, Gower  
20 Street, London WC1E 6BT, UK

21 <sup>7</sup>Institute of Molecular Biology and Biotechnology, Foundation for Research and  
22 Technology, Heraklion, Greece

23

24 \*The authors contributed equally to the work

25 Correspondence: George Diallinas: [diallina@biol.uoa.gr](mailto:diallina@biol.uoa.gr) and Sandra Paiva:  
26 [spaiva@bio.uminho.pt](mailto:spaiva@bio.uminho.pt)

27

28

## 29 **Abstract**

30 Plasma membrane (PM) transporters of the major facilitator superfamily (MFS) are  
31 essential for cell metabolism and growth, as well as for survival in response to stress  
32 or cytotoxic drugs, in both prokaryotes and eukaryotes. In the yeast *Saccharomyces*  
33 *cerevisiae*, Jen1 is a monocarboxylate/H<sup>+</sup> symporter that has been used to dissect  
34 the molecular details underlying control of cellular expression, transport mechanism  
35 and turnover of MFS transporters. Here, we present evidence supporting previously  
36 non-described roles of the cytosolic N- and C- termini in Jen1 biogenesis, PM  
37 stability and activity, through functional analyses of rationally designed truncations  
38 and chimeric constructs with UapA, a *S. cerevisiae* endocytosis-insensitive purine  
39 transporter from *Aspergillus nidulans*. Our results reveal a cryptic role of the N-  
40 terminal region and thus show that both cytosolic N- and C-termini are critical for  
41 Jen1 trafficking to the PM, transport activity and endocytosis. In particular, we  
42 provide evidence that the N- and the C-cytosolic termini of Jen1 undergo transport-  
43 dependent dynamic intra-molecular interactions, which critically affect the  
44 mechanism of transport and turnover of Jen1. Our results support an emerging  
45 concept where the cytosolic tails of PM transporters control transporter expression  
46 and function, through flexible intra-molecular interactions with each other and the  
47 transmembrane core of the protein. This idea may be extended to other MFS  
48 members providing a deeper understanding of conserved, but also evolving,  
49 mechanisms underlying MFS transporter structure-function relationships.

50 **Key words:** Major facilitator superfamily (MFS); transporters; monocarboxylic acids;  
51 endocytosis; arrestins; cytosolic termini; sorting; turnover; substrate specificity;  
52 ubiquitylation.

53

## 54 Introduction

55 Eukaryotic plasma membrane (PM) transporters play essential roles in cell nutrition,  
56 signalling, and responses to stress conditions and drugs. Consequently, transporter  
57 malfunction has an impact in many aspects of human cell biology and leads to  
58 several pathologies, including neurological and cardiovascular disorders, as well as  
59 diabetes and cancer (1–5). Given their importance in sensing the environment and  
60 maintaining cell homeostasis, transporter function depends on complex and fine  
61 regulatory mechanisms. Endocytic internalization is a major regulatory mechanism of  
62 PM transporters, mostly studied in the model fungi *Saccharomyces cerevisiae* and  
63 *Aspergillus nidulans*, in response to physiological or stress signals, followed by either  
64 their vacuolar degradation or recycling back to the PM via the TGN/endosomal  
65 system (for recent reviews see (6–8)). Endocytic internalization of fungal transporters  
66 requires ubiquitylation at their C- or N-terminal cytosolic regions by HECT-type E3  
67 ubiquitin ligases (e.g., Rsp5 in *S. cerevisiae* or HulA in *A. nidulans*), which are  
68 recruited by adaptor proteins named  $\alpha$ -arrestins (9–16). In *S. cerevisiae*, fourteen  $\alpha$ -  
69 arrestins have been identified, named Arts (Art1-10), Buls (Bul1-3) and Spo23,  
70 which all possess PY motif(s) that may interact with WW domains of Rsp5 Ub ligase,  
71 mediating membrane protein turnover (9, 10, 12, 17–19). *A. nidulans* possesses 10  
72  $\alpha$ -arrestins, including ArtA and PalF, which control transporter down-regulation and  
73 sensing, respectively (8, 14). In mammals, six  $\alpha$ -arrestins have been identified,  
74 named ARRDC proteins (20, 21), but much less is known regarding their role,  
75 specifically on transporter cellular expression. Notably, however, ARRDC6/TXNIP  
76 has been shown to function as an endocytic adaptor for the GLUT1 and GLUT4  
77 transporters (22, 23).

78 To exert their function,  $\alpha$ -arrestins need to recognize the cytoplasmic exposed  
79 segments of transporters, basically their N- or C-termini. Pioneering studies in *S.*  
80 *cerevisiae* have shown that the N-terminus parts of amino acid transporters Can1  
81 and Lyp1 are specifically recognized by  $\alpha$ -arrestins Art1 and Art2, respectively, under  
82 stress conditions (9). The N-terminus of the general amino acid transporter Gap1  
83 also contains a potential Bul1/2  $\alpha$ -arrestin interacting motif and two Ub target sites  
84 (K9 and K16) that are required for nitrogen-elicited endocytosis of Gap1 (24, 25).  
85 Additionally, under stress conditions, Bul1/2, in combination with Art3/Art6, promotes  
86 Gap1 ubiquitylation and down-regulation *via* Gap1 C-terminus (26). In these cases, it

87 is thought that conformational changes during substrate transport makes the N-  
88 terminus more accessible to  $\alpha$ -arrestins (25, 27). The methionine-specific transporter  
89 Mup1 also possess in its N-terminus a motif, proximal to the ubiquitylation sites (K27  
90 and K28), which is proposed to act as a putative Art1  $\alpha$ -arrestin target site required  
91 for substrate-elicited ubiquitylation and endocytosis (28). A putative Art1 interacting  
92 motif has also been found for Can1 (27, 28). In fact, Can1 N-terminus possesses  
93 specific lysines and two putative  $\alpha$ -arrestin interacting motifs (Art1 and Bul1/2), which  
94 are required for substrate-elicited ubiquitylation and endocytosis of the permease  
95 (27). The Fur4 uracil transporter N-terminus possesses Ub acceptor sites (K31 and  
96 K41) involved in ubiquitylation and endocytosis (29–31). Noticeably, the Fur4 N-  
97 terminus is likely to undergo dynamic conformational changes, in response to excess  
98 of substrate or stress, enhancing its endocytic down-regulation (31).

99 In the filamentous fungus *A. nidulans*, a C-terminus region of the uric acid  
100 transporter UapA is essential for ArtA-mediated ubiquitylation, endocytosis and  
101 vacuolar degradation in response to ammonium or excess of substrate (11, 14). *A.*  
102 *nidulans* Fur4 homologues have also been shown to possess elements in their N-  
103 and C-terminus that are critical for endocytosis and surprisingly substrate specificity.  
104 In this case, the authors provided evidence that the N- and the C-terminus interact  
105 physically and promote proper transporter function and turnover (32, 33).

106 Whether long-range regulatory effects of cytosolic N- and C-termini extend to  
107 transporters other than Fur-like proteins and a handful of other members of the  
108 amino acid–polyamine–organocation (APC) superfamily (34), remains to be formally  
109 shown.

110 Here, we address this issue by using Jen1, a well-studied yeast transporter  
111 that represents the ubiquitous and largest transporter family, namely the major  
112 facilitator superfamily (MFS). In particular, we genetically and functionally dissect the  
113 role of both cytosolic N- and C-termini of Jen1 and provide compelling evidence for a  
114 cryptic role of the N-terminus of Jen1, which together with sequence elements in the  
115 C-terminal region, control the biogenesis, activity and turnover of Jen1. Most  
116 importantly, using quantitative bi-fluorescence complementation (BiFC) assays, we  
117 present evidence that the two Jen1 termini interact dynamically in a transport-activity  
118 dependent manner, which ultimately regulates Jen1 cell-surface expression and  
119 activity. Our findings support the idea that cytosolic tails in eukaryotic transporters

120 have acquired important multi-functional roles and thus reveal novel regulatory  
121 mechanisms of MFS family members.

122

## 123 **Results**

### 124 **Rationale for constructing specific Jen1 truncations and chimeric transporters**

125 Jen1 is a specific monocarboxylate/H<sup>+</sup> symporter (lactate and pyruvate being its  
126 major substrates) that has been used extensively as a model cargo to dissect  
127 mechanisms of regulated transporter internalization. Jen1 ubiquitylation, endocytosis  
128 and vacuolar degradation are regulated by two  $\alpha$ -arrestins (Rod1 and Bul1), in  
129 response to distinct stimuli (16, 35). Rod1-mediated endocytosis of Jen1 requires the  
130 presence of a preferred carbon source, such as glucose, in a substrate transport-  
131 independent manner (16, 35). In addition, conformational changes associated to  
132 substrate transport are likely to trigger Bul1-mediated endocytosis of Jen1, in  
133 response to alkali stress (16). Recently, a C-terminal region of Jen1 was reported to  
134 be involved in Rod1-mediated endocytosis of the transporter, triggered by glucose  
135 (36). Several specific lysines in Jen1 protein were reported to be required for its  
136 ubiquitylation and endocytosis (15, 35–37).

137 To address the role of the cytosolic termini of Jen1 in its regulation, we  
138 employed specific N- or C-terminus truncations of Jen1, as well as chimeric  
139 transporters based on the UapA transporter from *A. nidulans*, carrying the cytosolic  
140 termini of Jen1. UapA is an extensively studied uric acid-xanthine/H<sup>+</sup> symporter (for a  
141 review see (38)), which is regulated by ammonium or substrate-elicited endocytosis  
142 in *A. nidulans*. However, upon functional expression in *S. cerevisiae*, it does not  
143 respond to endocytosis and, instead, remains stable at the PM (39). Thus, UapA  
144 provides an appropriate molecular marker for investigating, via domain swap  
145 experiments, the potential, context-independent, functional role of *cis*-acting  
146 elements present in Jen1 N- or C-terminal regions.

147 Prior to these constructions, it was essential to define the limits of the N- and  
148 C-terminus of Jen1 based on available structural information. The selection of the  
149 number of residues corresponding to the cytosolic N- and C-terminus portions of  
150 Jen1, which lacks an experimentally defined structure, was based on standard  
151 topology predictions and homology threading modelling, using various bioinformatic

152 tools (detailed in **Table S1**). These predictions were used to construct three Jen1  
153 truncated versions by deleting the longest predicted N-terminal region (133 residues)  
154 and the two versions of the putative C-terminus (62 or 33 residues) of Jen1. The  
155 resulting truncated versions were named Jen1 $\Delta$ NT133, Jen1 $\Delta$ CT62 or Jen1 $\Delta$ CT33  
156 (**Figure 1A**). Based on the recent work of Fujita and co-workers (2018), we also  
157 generated a shorter N-terminal truncation (Jen1 $\Delta$ NT94) and the doubly truncation  
158 Jen1 $\Delta$ NT94 $\Delta$ CT33. Chimeras of UapA/Jen1 were constructed as illustrated in  
159 **Figure 1B**. Briefly, the intact UapA sequence was fused with amino acid segments  
160 1-94 or/and 584-616 of Jen1 termini, resulting in the chimeric transporters named  
161 UapA/Jen1NT94, UapA/Jen1CT33 and UapA/Jen1NT94-CT33.

**A**

**Jen1 WT**

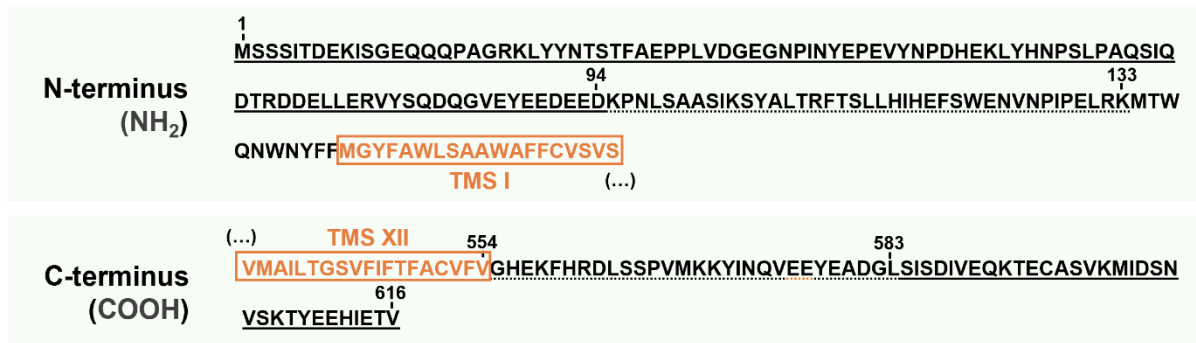

**B**

— Jen1 (PM proton-linked monocarboxylate transporter from *S. cerevisiae*)  
 — UapA (PM proton-linked purine transporter from *A. nidulans*)

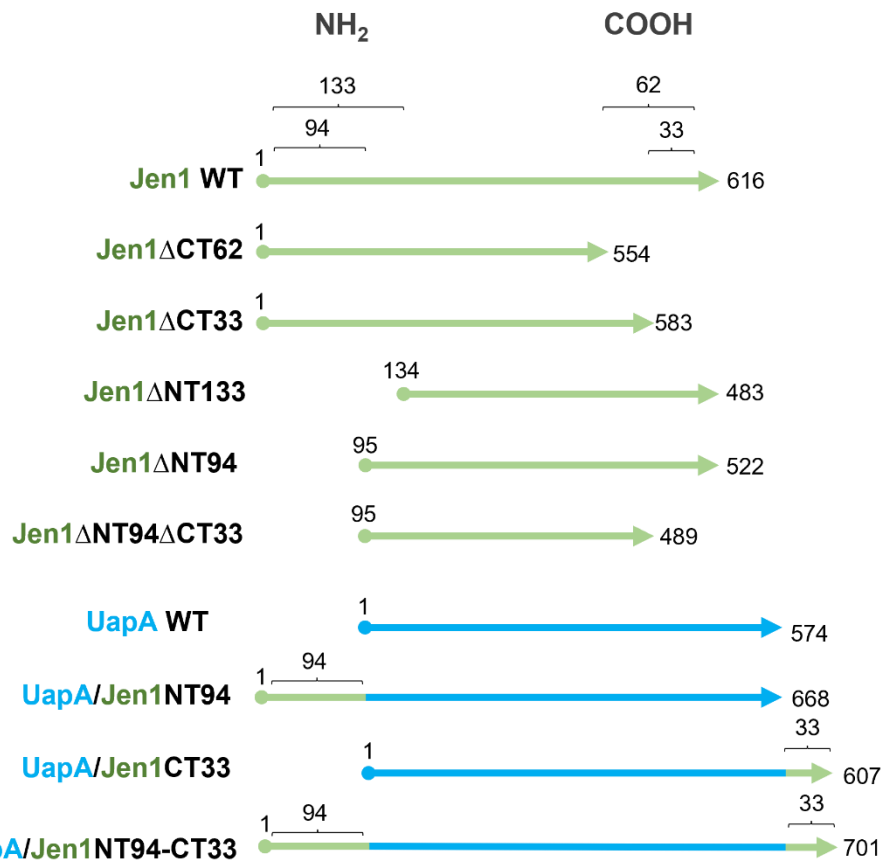

162

163

164

165

166

167

168

169

**Figure 1 – Designing of truncations and chimeric versions of Jen1. (A) Primary amino acid sequences of the N- and C-terminal regions of Jen1 transporter.** N- and C-terminal predicted regions of Jen1 transporter are shown in black letters. The number of residues corresponding to these regions is indicated. Residues framed in orange correspond to predicted first or last transmembrane segments (TMSI and TMSXII, respectively), as defined by secondary prediction programs (see in Experimental Procedures). **(B) Graphical representation of truncated Jen1 versions and Jen1-UapA chimeric transporters.** Jen1

170 and UapA sequences are shown in green and blue, respectively. Jen1 mutant versions were  
171 cloned either under the control of the strong GPD (glyceraldehyde-3-phosphate  
172 dehydrogenase) promoter, which allows the constitutive expression of *JEN1* (40), or under  
173 the control of the *GAL* promoter, enabling the expression of *JEN1*, under galactose (2 %,  
174 w/v) inducible conditions.

175

## 176 **Specific N- and C-terminally-truncations result in Jen1 versions with modified** 177 **PM localization, stability and transport kinetics**

178 We analysed the growth pattern and transport activities of strains expressing Jen1  
179 truncations, compared to those observed with a strain expressing wild-type Jen1  
180 (**Figure 2A** and **2B**). In all cases, Jen1 versions were functionally tagged, C-  
181 terminally, with GFP. Phenotypic assays demonstrated that all shorter Jen1 termini  
182 truncations (Jen1 $\Delta$ NT94, Jen1 $\Delta$ CT33 and Jen1 $\Delta$ NT94 $\Delta$ CT33) were able to confer  
183 lactate growth (as sole carbon source) similar to the wild-type Jen1. In contrast, the  
184 longer cytosolic Jen1 truncations (Jen1 $\Delta$ NT133 and Jen1 $\Delta$ CT62) scored as *null*  
185 Jen1 mutants in growth tests (**Figure 2A**). Jen1-mediated lactate transport activity  
186 measurements, performed under Jen1-derepressed conditions (see Materials and  
187 methods), showed that Jen1 $\Delta$ NT133 and Jen1 $\Delta$ CT62 truncations displayed residual  
188 or no lactate transport activity, in line with growth tests. Also, in accordance with  
189 growth tests, Jen1 $\Delta$ NT94, Jen1 $\Delta$ CT33 and Jen1 $\Delta$ NT94 $\Delta$ CT33 truncations were able  
190 to import lactate with apparent rates similar to those measured in the wild-type Jen1  
191 (**Figure 2B**). The recorded transport capacities in the mutants were in agreement  
192 with measurements of alkalization of the external medium via Jen1-dependent  
193 lactate uptake (16), as among the truncations, only Jen1 $\Delta$ NT94, Jen1 $\Delta$ CT33 and  
194 Jen1 $\Delta$ NT94 $\Delta$ CT33 led to an increase in the pH of the medium (**Figure S1A**).

195 The subcellular localization of Jen1 truncations (**Figure 2C**) was followed  
196 under conditions that promote Jen1 localization to the PM (Lac 4 h), or conditions  
197 that lead to endocytic turnover, such as addition of glucose (Lac 4 h + Gluc 2 h) or  
198 prolonged growth on lactate (Lac 24 h) (16). As expected, stable localization of wild-  
199 type (WT) Jen1 to the PM was observed upon lactate induction (Lac 4 h), while  
200 endocytosis and sorting to vacuoles for degradation was observed upon 2 h of  
201 growth in the presence of glucose, and more dramatically after 24 h growth on  
202 lactate. The larger truncations Jen1 $\Delta$ NT133 and Jen1 $\Delta$ CT62 showed significant ER



203 retention of the protein, revealed by fluorescent labelling of perinuclear ER rings, but  
204 also discontinuity of the fluorescence signal at the cell periphery, typical of cortical  
205 ER (cER) in yeast. Co-staining with CMAC excluded that the observed intracellular  
206 rings correspond to vacuoles (**Figure S1B**). In the case of Jen1 $\Delta$ CT62, localization  
207 to the ER was formally confirmed by expression in a *S. cerevisiae* strain lacking all  
208 six ER-PM tethering proteins. In this strain (called  $\Delta$ tether), the cER has no contact  
209 with the PM so that ER resident proteins can be unambiguously distinguished from  
210 those localized to the PM (41). Using this strain, we showed that the cER, marked  
211 with an ER-resident red-fluorescing marker (DsRED-HDEL), co-localized fully with  
212 Jen1 $\Delta$ CT62-GFP, but not with the functional truncation Jen1 $\Delta$ CT33-GFP (**Figure**  
213 **S2A**).

214 The smaller functional Jen1 truncations gave a rather surprising result in  
215 respect to PM localization. Jen1 $\Delta$ NT94, although being functional, as demonstrated  
216 by growth tests and transport uptakes (**Figure 2A** and **2B**), proved to be unstable in  
217 terms of subcellular localization, undergoing very rapid internalization and vacuolar  
218 degradation (**Figure 2C**, **Figure S1B**). This suggests that Jen1 $\Delta$ NT94, after basal  
219 constitutive expression, is very sensitive to endocytosis in response to the presence  
220 of its substrate (lactate) or glucose. In sharp contrast, Jen1 $\Delta$ CT33 homogeneously  
221 and stably localized to the PM with no indication of ER retention or vacuolar  
222 degradation after 4 h lactate induction (**Figure 2C**, **Figure S2A**). Notably,  
223 Jen1 $\Delta$ CT33 led to a stronger fluorescence signal associated with PM compared to  
224 the wild-type, suggesting that this truncation stabilizes the transporter. This justified  
225 the moderate increase in the relative apparent transport activity obtained by direct  
226 uptake measurements (**Figure 2B**). Jen1 $\Delta$ CT33 also showed reduced endocytosis  
227 upon glucose addition or after prolonged growth on lactate, the latter being more  
228 evident when compared to the wild-type control (**Figure 2C**, **Figure S1B**). Reduced  
229 endocytosis might well be due to the increased stability of this Jen1 version,  
230 observed in the absence of signals triggering endocytosis (i.e., 4 h Lac). Most  
231 surprisingly, the doubly truncated Jen1 $\Delta$ NT94 $\Delta$ CT33 version was also stably  
232 localized to the PM, similar to Jen1 $\Delta$ CT33, and, in addition, it was more resistant to  
233 both signals triggering endocytosis, when compared to both WT Jen1 and Jen1 $\Delta$ C33  
234 (**Figure 2C**, **Figure S1B**). This suggested that truncating the 33 last residues of Jen1  
235 is not just epistatic to the instability conferred by deleting the N-terminal 94 residues,  
236 but also pointed to the idea that the two termini of Jen1 interact functionally.

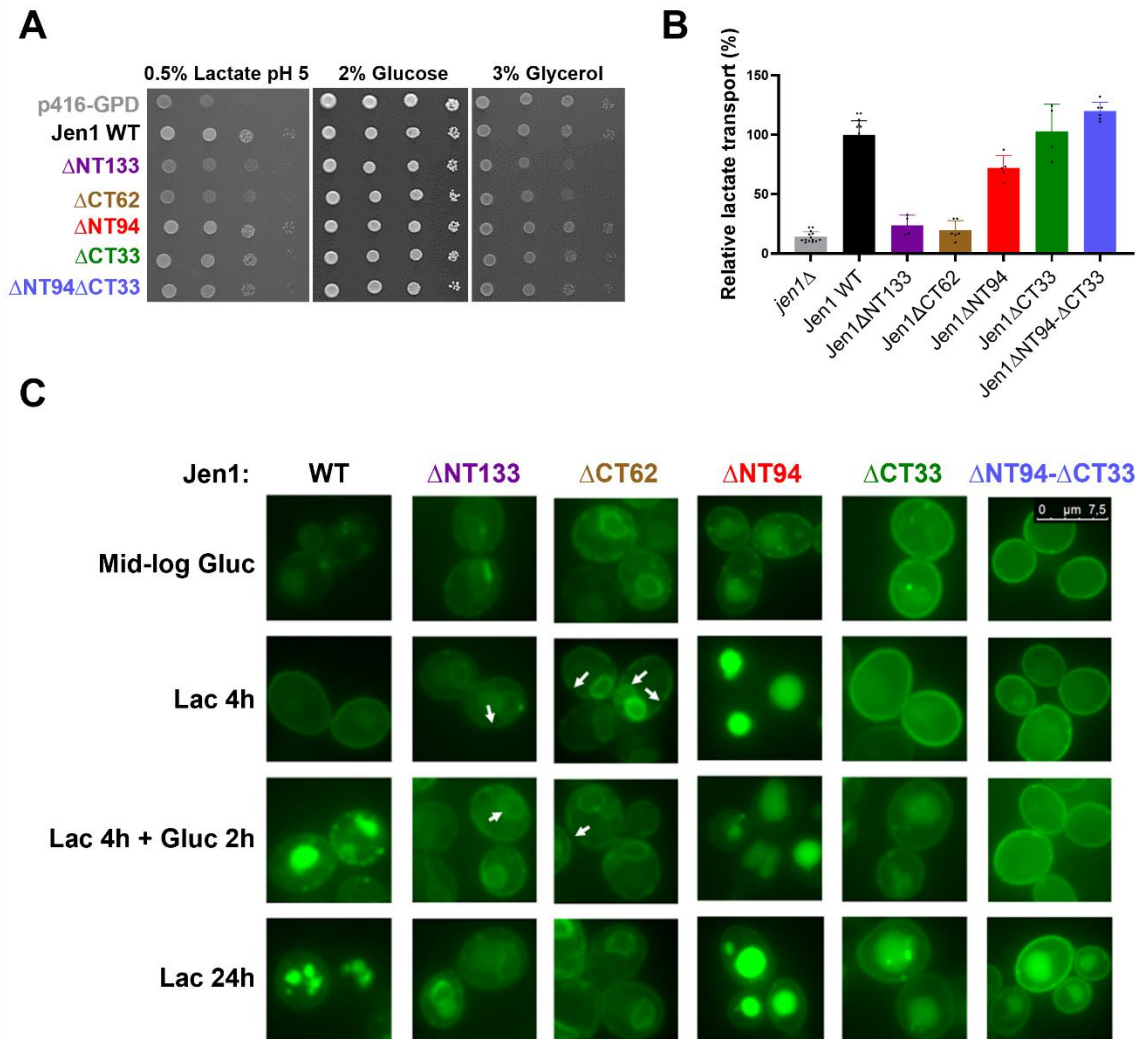

237

238 **Figure 2 – Removing specific segments of Jen1 cytoplasmic N- and C- termini**  
 239 **modifies protein PM localization and transport kinetics.** *S. cerevisiae* *jen1* $\Delta$  cells  
 240 expressing the empty p416-GPD plasmid (*jen1* $\Delta$ ), the *JEN1* gene (Jen1 WT), or five *JEN1*  
 241 mutant versions (Jen1 $\Delta$ CT33, Jen1 $\Delta$ CT62, Jen1 $\Delta$ NT133, Jen1 $\Delta$ NT94 and  
 242 Jen1 $\Delta$ NT94 $\Delta$ CT33), tagged with GFP, were characterized by growth assays (A), transport  
 243 uptakes (B) and epifluorescence microscopy (C). (A) Serial 1:10 dilutions of yeast cells were  
 244 spotted onto YNB containing plates supplemented with three distinct carbon sources:  
 245 glucose (2 %, w/v), glycerol (3 %, v/v) or lactate (0.5 %, v/v, pH 5.0). Cells were grown for 7  
 246 days at 18 °C. (B) Percentage of  $^{14}$ C-lactic acid uptake, at pH 5.0, in YNB lactic acid-  
 247 derepressed cells. The rate of wild-type Jen1 is taken as 100 %. Individual data points are  
 248 shown. Error bars correspond to standard deviation values. (C) Epifluorescence microscopy  
 249 analysis of Jen1-GFP or its derivatives. Samples were collected after growth on glucose  
 250 (Mid-log Gluc), after derepression in lactate medium for 4 hours (Lac 4 h), after 2 hours of a  
 251 pulse of glucose (2 %, w/v) to Lac 4 h induced cells (Lac 4 h + Gluc 2 h) or after prolonged  
 252 growth on lactate (Lac 24 h).

253

254 To better understand the combinatorial effect of deletions of terminal  
255 segments on Jen1 function, we investigated, via direct measurements of lactic acid  
256 transport, whether functional truncations (Jen1 $\Delta$ NT94, Jen1 $\Delta$ CT33 and  
257 Jen1 $\Delta$ NT94 $\Delta$ CT33) affect the transport kinetics of lactate (**Figure 3**). All Jen1  
258 truncations tested, including Jen1 $\Delta$ NT94, which proved to be an unstable version of  
259 Jen1, displayed higher substrate affinities (lower  $K_m$ ) compared to wild-type Jen1.  
260 Notably, deleting the C-terminal region in Jen1 $\Delta$ CT33 resulted in a 10-fold increase  
261 in substrate affinity. The doubly truncated Jen1 $\Delta$ NT94 $\Delta$ CT33 version and  
262 Jen1 $\Delta$ NT94 also had 2.5 to 3-fold increased affinity for lactate. Thus, transport  
263 kinetic parameters for Jen1 truncations revealed that specific segments of the N- and  
264 C- termini of the Jen1 transporter are critical for substrate binding and transport  
265 dynamics, in addition to their role in PM sorting, stability and regulated endocytosis.  
266 These results unmask a previously unnoticed functional interaction of the N- and C-  
267 tails, highlighted by the fact that the doubly truncated Jen1 version had an  
268 expression and functional profile distinct from the single truncations.

269

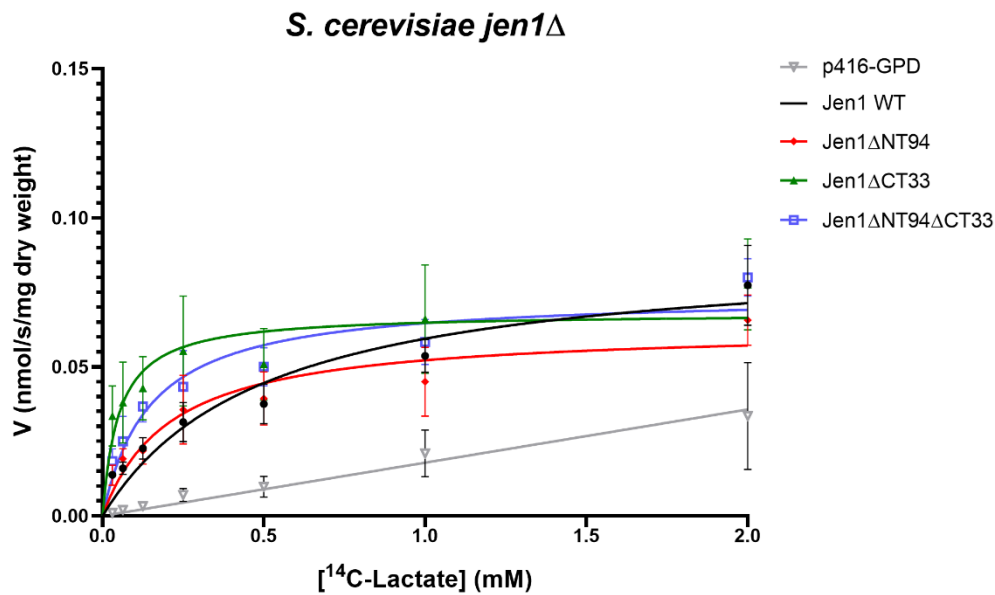

| Lactate                        |                   |                                     |
|--------------------------------|-------------------|-------------------------------------|
| Kinetic parameters ( $\pm$ SE) |                   |                                     |
| Transporter                    | $K_m$<br>(mM)     | $V_{max}$<br>(nmol/s/mg dry weight) |
| Jen1 WT                        | 0.501 $\pm$ 0.097 | 0.089 $\pm$ 0.007                   |
| Jen1ΔNT94                      | 0.210 $\pm$ 0.046 | 0.063 $\pm$ 0.004                   |
| Jen1ΔCT33                      | 0.050 $\pm$ 0.015 | 0.068 $\pm$ 0.004                   |
| Jen1ΔNT94ΔCT33                 | 0.148 $\pm$ 0.026 | 0.074 $\pm$ 0.004                   |

270

271 **Figure 3 – Transport kinetics of Jen1 truncations.** The upper panel shows initial uptake  
 272 rates of radiolabelled  $^{14}\text{C}$ -lactic acid, pH 5.0, as a function of lactate concentration in *S.*  
 273 *cerevisiae* *jen1Δ* cells expressing *JEN1* gene (Jen1 WT), *JEN1* mutant versions  
 274 (Jen1ΔNT94, Jen1ΔCT33 and Jen1ΔNT94ΔCT33), or transformed with p416-GPD (empty  
 275 vector) as a control. The respective kinetic parameters are highlighted in the table (lower  
 276 panel). The data shown are mean values of at least three independent experiments and the  
 277 error bars represent the standard deviation.  $K_m$  and  $V_{max}$  were determined using the  
 278 GraphPad Prism 8.  $K_m$ , Michaelis-Menten constant; SE, standard error;  $V_{max}$ , maximum  
 279 velocity.

280

281 **Maximal glucose-triggered endocytic turnover of Jen1 involves interactions of**  
 282 **Rod1 and Bul1/2 at the C-terminal segment and N- terminus, respectively**

283 The degradation of Jen1 induced by glucose was reported to require both Rod1 and  
 284 Bul1 arrestins (35, 42). It was thus proposed that multiple  $\alpha$ -arrestins may act

285 sequentially to recruit the ubiquitylation machinery preceding endocytosis. Although  
286 the specific lysines residues necessary for ubiquitylation of Jen1 still remain under  
287 dispute, a glucose-responding degron recognized by Rod1 has been recently  
288 identified in the C-terminus of Jen1 (36). No binding motif has been identified for the  
289 Bul1 arrestin.

290 Here, we investigated the localization and protein levels of the Jen1 functional  
291 truncations in a standard wild-type background (i.e., *ROD1+ BUL1/2+*) and in strains  
292 lacking these protein adaptors (i.e., *rod1Δ*, *bul1Δbul2Δ* or *rod1Δbul1Δbul2Δ*) (**Figure**  
293 **4**, **S3** and **S4**). In these assays, cells were grown under Jen1 induction conditions  
294 (Gal 5 h), and then glucose was added for 2 or 4 h to trigger Jen1 internalization (for  
295 details see Material and methods). At the times indicated, cells were collected,  
296 visualized by fluorescence microscopy and proteins extracts were prepared and  
297 analysed by western blot.

298 Results obtained in the wild-type background showed that wild-type Jen1 is  
299 internalized and targeted for vacuolar degradation after glucose addition (**Figure**  
300 **4A**). This is further confirmed by Jen1 co-localization with CMAC, a blue vacuolar  
301 marker (**Figure S3A**), and by the progressive decrease in protein steady state levels  
302 (**Figure 4E** and **S4A**). A similar picture in respect to Jen1 localization and stability  
303 was obtained in the strain lacking Bul1/2 proteins, suggesting that Bul1/2 participate  
304 little, if not at all, in the endocytosis of the wild-type transporter, under our  
305 experimental conditions (**Figure 4C** and **4G**; see also **S3C** and **S4**). When  
306 expressed in a strain lacking Rod1, the internalization and degradation of Jen1 is still  
307 evident, but delayed (**Figure 4B** and **4F**; see also **S3B** and **S4B**). In the triple-  
308 deletion mutant, *rod1Δbul1Δbul2Δ*, internalization of Jen1 is very low (**Figure 4D** and  
309 **4H**; see also **S3D** and **S4**). Thus, the fact that Jen1 endocytosis is significantly  
310 blocked only in the triple mutant indicates a role for both Rod1 and Bul1/2 in glucose-  
311 triggered endocytosis, in line with previous reports (35, 42). However, considering  
312 the western blots shown in **Figure 4E-H**, the role of Bul1/2 in glucose-triggered  
313 endocytosis was found to be more complex, as it seemed to depend on the presence  
314 or absence of Rod1. In general, the role of Bul1/2 seemed secondary to that of Rod1  
315 in respect to glucose-elicited endocytosis, as least under our experimental  
316 conditions.

317 Overall, the results obtained concerning wild-type Jen1 point to the conclusion  
318 that, in the presence of glucose, Rod1 is the principal arrestin mediating endocytosis,

319 and that Bul1/2 might have a secondary role, especially when Rod1 expression is  
320 genetically blocked. To further investigate the possible connection between Jen1  
321 cytosolic tails with the action of Rod1 and Bu1/2 arrestins, we carried out similar  
322 experiments using the truncated versions of Jen1.

323 Fluorescent assays and western blot analysis confirmed that Jen1 $\Delta$ NT94 is a  
324 very unstable Jen1 version, being rapidly degraded after glucose treatment, in the  
325 wild-type (**Figure 4A** and **4E**; see also **S4**), but also in the *bul1 $\Delta$ bul2 $\Delta$*  background  
326 (**Figure 4C** and **4G**; see also **S4**). However, Jen1 $\Delta$ NT94 stability and PM localization  
327 increased significantly when *ROD1* was knocked-out (**Figure 4B** and **4F**; see also  
328 **S4**). A similar picture was obtained in the triple mutant, *rod1 $\Delta$ bul1 $\Delta$ bul2 $\Delta$*  (**Figure 4D**  
329 and **4H**; see also **S4**). These observations suggest that Rod1 functions via  
330 interaction with the Jen1 C-tail, as also previously reported (36). Of note, Jen1 $\Delta$ NT94  
331 protein levels were extremely low, at the limit of detection, in strains lacking Bul1 and  
332 Bul2 proteins (*bul1 $\Delta$ bul2 $\Delta$*  or *rod1 $\Delta$ bul1 $\Delta$ bul2 $\Delta$* ) (**Figures 4G** and **4H**).

333 Fluorescent assays and western blot analysis confirmed that Jen1 $\Delta$ CT33 is a  
334 significantly stabilized Jen1 version, under all conditions tested (**Figure 4A** and **4E**).  
335 The absence of Rod1 did not increase further the stability of Jen1 $\Delta$ CT33 in the PM  
336 (**Figure 4B** and **4F**), in line with the fact that Rod1 operates via the 'missing' C-tail  
337 segment. However, when Bul1/2 are genetically knocked-out, Jen1 $\Delta$ CT33 was stably  
338 localized to the PM, even after 4 h of glucose addition (**Figure 4C** and **4G**). This  
339 finding revealed an additive effect of the absence of the last 33 amino acid residues,  
340 which include the Rod1 binding site (36), with the absence of Bul1/2 proteins. This  
341 result supports the idea that, under glucose-triggered endocytic conditions, Bul1/2  
342 proteins exert their action via the N-tail of Jen1, while Rod1 acts via the C-tail, thus  
343 also justifying why Jen1 becomes fully stabilized in the PM when the action of both  
344 types of arrestins is genetically suppressed. Notice again that the role of Bul1/2  
345 seems more prominent when Rod1 is missing, suggesting a sequential action of  
346 these arrestins. Results obtained in *rod1 $\Delta$ bul1 $\Delta$ bul2 $\Delta$*  (**Figure 4D** and **4H**) reinforced  
347 the aforementioned conclusions. Noticeably also, in the triple *rod1 $\Delta$ bul1 $\Delta$ bul2 $\Delta$*   
348 mutant localization of the doubly truncated Jen1 version (Jen1 $\Delta$ NT94 $\Delta$ CT33) to the  
349 PM is 'absolute' and Jen1 protein steady state levels are at their maximum (**Figure**  
350 **4D** and **4H**), whereas in the same genetic background wild-type Jen1 is undergoing  
351 low endocytosis and turnover, best seen after 4 h of glucose addition. This suggests  
352 that other arrestins, other than Bul1/2 or Rod1, might still recognize, albeit with lower

353 affinities, the cytosolic tails of Jen1 and thus promote moderate endocytosis. Thus,  
354 the truncation of both cytosolic terminal segments of Jen1 proves to be pivotal for  
355 generating a Jen1 version that is fully insensitive to endocytosis.

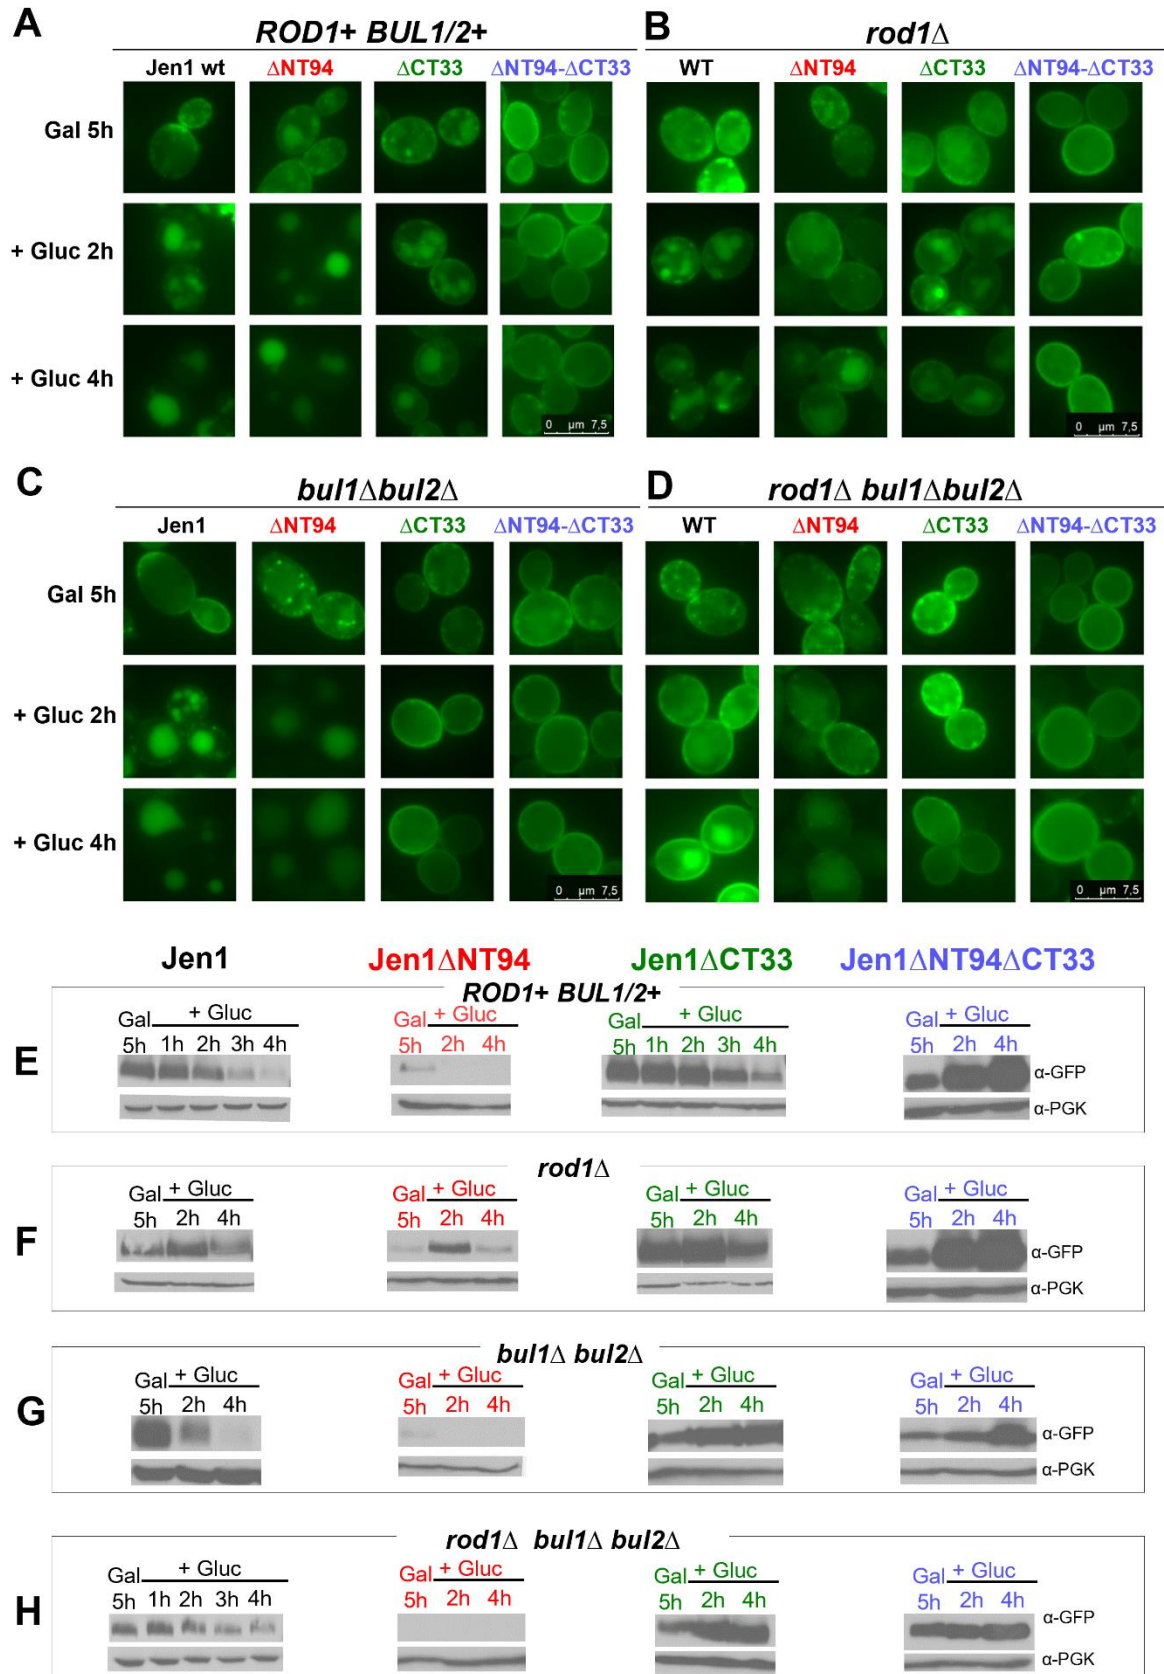

356

357 **Figure 4 - Jen1 N- and C- termini are both involved in glucose-induced down-**  
 358 **regulation.** Cells of *S. cerevisiae* *ROD1+ BUL1/2+*, *rod1Δ*, *bul1Δbul2Δ* or *rod1Δbul1Δbul2Δ*,



359 expressing the Jen1 truncations tagged with GFP and expressed under a GAL promoter  
360 were analysed by epifluorescence microscopy (**A-D**) and by western blot (**E-H**). Cells  
361 expressing Jen1 WT and Jen1 truncations (Jen1 $\Delta$ NT94, Jen1 $\Delta$ CT33 or Jen1 $\Delta$ NT94 $\Delta$ CT33)  
362 were grown overnight in YNB glucose (2 %, w/v) medium and, after being washed twice in  
363 deionized water, cells were transferred to YNB galactose (2 %, w/v) medium to induce Jen1  
364 expression of the Jen1 constructs. After 5 h in galactose medium, glucose was added. Cells  
365 were visualized by fluorescent microscopy at specific time points (Gal 5 h, Gal 5 h + Gluc 2 h  
366 and Gal 5 h + Gluc 4 h). At the same time points, cells were harvested, and protein extracts  
367 prepared for Western immunoblotting with an anti-GFP antibody or anti-phosphoglycerate  
368 kinase (PGK) antibody (loading control).

369

### 370 **The C-terminus of Jen1 is sufficient for promoting glucose-elicited turnover of** 371 **UapA via interaction with Rod1**

372 The UapA transporter heterologously expressed in *S. cerevisiae* is not endocytosed  
373 by glucose, ammonium or excess of substrate ((39) and G.D. unpublished). This  
374 might be due to the fact that the  $\alpha$ -arrestin adaptors of *S. cerevisiae* are not  
375 functionally orthologous to those of *A. nidulans* (14) or that the ubiquitylation and/or  
376 endocytic machineries in the two fungi are not functionally complementary. We took  
377 advantage of the stability of UapA expressed in *S. cerevisiae*, under all conditions  
378 tested, to obtain more information on the role of cytosolic terminus domains of Jen1.  
379 We thus constructed chimeras between Jen1 and UapA transporters by adding the  
380 shorter segments of the cytosolic N- and C-termini of Jen1 to the intact UapA  
381 transporter (see **Figure 1B**). For details of strains see Materials and methods. We  
382 analysed these chimeras by uptake transport assays, epifluorescence microscopy  
383 and western blotting, in different *S. cerevisiae* strains (**Figure 5**).

384 Transport assays showed that wild-type UapA, UapA/Jen1NT94,  
385 UapA/Jen1CT33 and UapA/Jen1NT94-CT33 could all confer saturable xanthine  
386 import, showing that a fraction of UapA and the UapA/Jen1 chimeras reach the PM  
387 and are transport-active. In particular, UapA and the single chimeras  
388 UapA/Jen1NT94 and UapA/Jen1CT33 showed very similar  $K_m$  and  $V_m$  values,  
389 similar also to the native  $K_m$  of UapA measured in *A. nidulans* (**Figure 5A**). On the  
390 other hand, the 'double' chimera UapA/Jen1NT94-CT33 showed reduced transport  
391 function, as the relevant  $K_m$  and  $V_m$  values were increased and reduced, respectively

392 **(Figure 5A)**, an indication that this chimera might be partially misfolded when  
393 expressed in yeast.

394 The localization of wild-type UapA and the three chimeras (UapA/Jen1NT94,  
395 UapA/Jen1CT33 and UapA/Jen1NT94-CT33) was followed in a standard wild-type  
396 *S. cerevisiae* carrying a *jen1* deletion (*jen1* $\Delta$ ) and in a strain lacking all six ER-PM  
397 tethering proteins. **Figure 5B** (upper row) shows that in a standard wild-type  
398 background, upon transcriptional induction (Gal O.N.), UapA and the 'single'  
399 chimeras UapA/Jen1NT94 and UapA/Jen1CT33, all showed significant PM  
400 localization, concomitant however with partial retention in the ER, especially in the  
401 case of UapA/Jen1NT94, as revealed by the fluorescent labelling of perinuclear ER  
402 membranes. The double chimera UapA/Jen1NT94-CT33 seemed to be massively  
403 retained in ER-like cytosolic structures (**Figure 5B**). When expressed in the strain  
404 lacking the ER-PM tethering proteins ( $\Delta$ tether), UapA and all chimeras tested  
405 showed increased, but variable, PM localization (**Figure S6**). More specifically, UapA  
406 labeled exclusively the PM, UapA/Jen1CT33 showed strong PM labelling and very  
407 minor ER retention, UapA/Jen1NT94 localized mostly in the PM and partial retention  
408 in perinuclear ER rings, while the great majority of UapA/Jen1NT94-CT33 molecules  
409 were retained in the ER. These results confirmed those obtained in the standard  
410 genetic background used in most of this study. Thus, our findings showed that all  
411 UapA-Jen1 chimeras translocate to the PM, albeit with different efficiency, which was  
412 in accordance with uptake assays showing that chimeras are functional, as they all  
413 mediate xanthine import (**Figure 5B** and **S5**). Noticeably, expression of UapA and  
414 UapA-Jen1 chimeras in the  $\Delta$ tether strain showed significantly increased  
415 translocation to the PM, compared to the expression in our standard yeast strain. In  
416 other words, abolishment of cER-PM contacts enhanced translocation of UapA and  
417 chimeras to the PM. This is a rather surprising and interesting result that needs to be  
418 followed in the future, given it falls beyond the scope of the present work.

419 After having established that UapA and UapA-Jen1 chimeras are functionally  
420 translocated to the yeast PM, we followed their response to glucose-triggered  
421 endocytosis. **Figure 5B** (middle and lower rows) shows that in the presence of  
422 glucose the localization profile of UapA, UapA/Jen1NT94 and UapA/Jen1NT94-CT33  
423 was similar with that obtained without glucose, suggesting that the relevant proteins  
424 are insensitive to glucose-triggered endocytosis. In contrast, UapA/Jen1CT33  
425 showed some evidence for glucose triggered endocytosis, clearer after 2 h of

426 glucose addition. This conclusion was well supported by the observation that  
427 UapA/Jen1CT33 co-localized with the blue vacuolar marker, a result not observed  
428 with UapA or the other chimeras (**Figure S5A**). To further confirm the response of  
429 UapA/Jen1CT33 to glucose-elicited endocytosis, we measured the steady state  
430 protein levels of these proteins by western blotting. As shown in **Figure 5E**, solely  
431 UapA/Jen1CT33 protein levels were significantly reduced in the presence of glucose.  
432 This suggests that the C-terminus of Jen1 is sufficient to promote glucose-elicited  
433 turnover of UapA, in a context-independent manner.

434 We, subsequently, analysed the localization and the protein steady state  
435 levels of UapA and UapA-Jen1 chimeras in *rod1* $\Delta$  and *bul1* $\Delta$ *bul2* $\Delta$  strains, in the  
436 absence or presence of glucose. In both strains and in all conditions tested, wild-type  
437 UapA was stably translocated to the PM with some evidence of moderate ER-  
438 retention (**Figure 5C, 5D, 5E, 5F, 5G** and **S5A**). This confirmed that wild-type UapA  
439 does not respond to endocytosis in yeast, and very probably it is not recognized by  
440 Rod1 or Bul1/2. UapA/Jen1CT33, a chimera shown previously to respond to  
441 endocytosis by glucose in a wild-type background (i.e., *ROD1+BUL1/2+*), when  
442 expressed in *rod1* $\Delta$  strain remained stably localized to the PM irrespective of  
443 presence or absence of glucose (**Figure 5C, 5F** and **S5B**). This result, best  
444 highlighted when comparing western blots in **Figure 5E** and **5F**, showed that  
445 UapA/Jen1CT33 endocytosis is mediated by Rod1, in line with the idea that Rod1  
446 binds to the C-terminal segment of Jen1. UapA/Jen1CT33 biogenesis in *bul1* $\Delta$ *bul2* $\Delta$   
447 was less clear. In the microscopy analysis, no fluorescence could be detected, as  
448 probably expected, a convincing response to glucose-triggered endocytosis (**Figure**  
449 **5D** and **S5C**), but in western blots it was clear that the steady state levels of this  
450 chimera are down-regulated by glucose, similar to the result obtained in the  
451 *ROD1+Bul1/2+* wild-type background (**Figure 5G**). Thus, Bul1/2, unlike Rod1, did not  
452 seem to contribute to UapA/Jen1CT33 endocytosis.

453 Subcellular localization results, obtained with UapA/Jen1NT94 and especially  
454 with UapA/Jen1NT94-CT33, were more complex to interpret regarding the role of  
455 Jen1 terminal regions, mostly due to significant ER-retention of these chimeras  
456 (**Figure 5C, 5D, S5B** and **S5C**). Based solely on the western blot analysis (**Figure**  
457 **5E, 5F** and **5G**), we may conclude that none of the two chimeras responds to  
458 glucose-triggered endocytosis, given that their steady state levels were little changed  
459 both in the presence and in the absence of glucose.

460 Overall, our results supported the concept that Rod1 binds directly to the Jen1  
461 C-terminal 33 amino acid residues added in the tail of UapA, and thus promotes  
462 endocytosis of the respective chimera, in response to glucose. This further shows  
463 that interaction of Rod1 with a specific sequence motif present at the C-terminal of  
464 Jen1 is context-independent. On the other hand, the presence of the Jen1 N-  
465 terminus did not seem critical for the turnover of UapA, suggesting that the proposed  
466 interaction of Bul1/2 proteins with this region might be weaker and/or context-  
467 dependent.

468

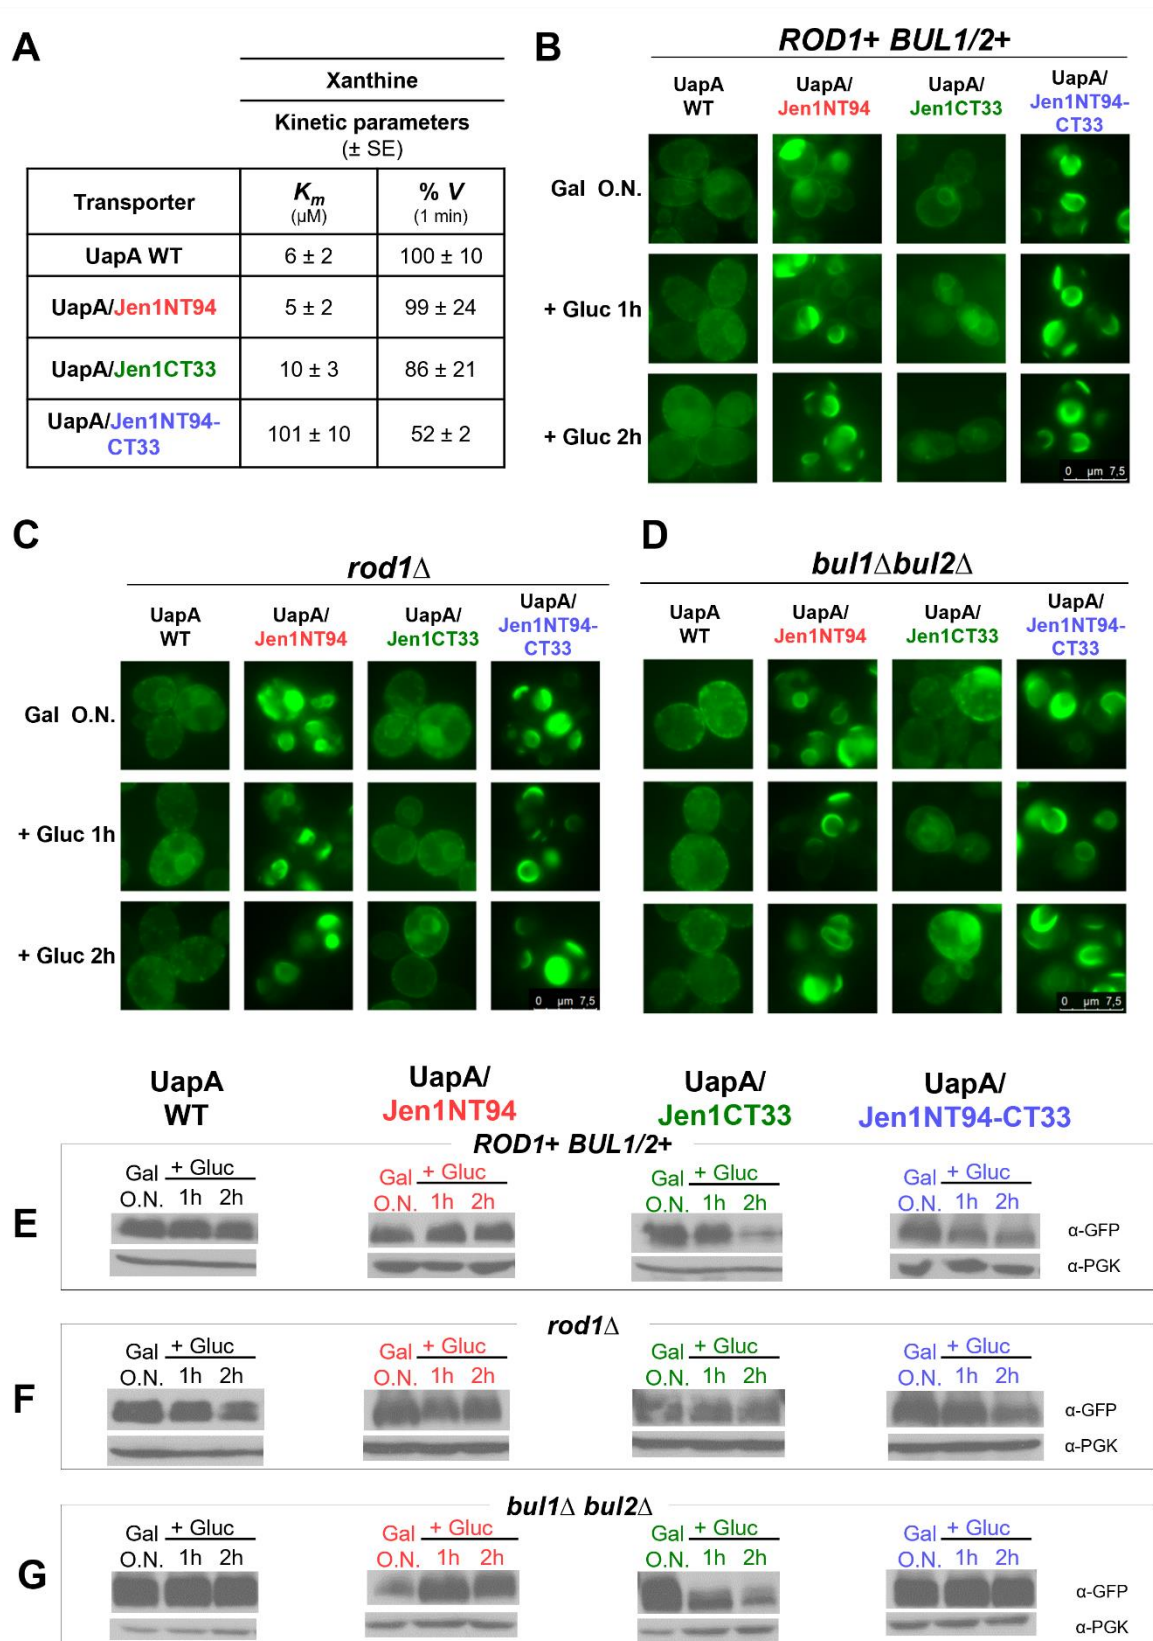

469

470 **Figure 5 – The CT33 segment of Jen1 confers sensitivity to glucose-triggered**  
 471 **endocytosis to UapA via interaction with Rod1.** Cells of *S. cerevisiae* *ROD1+ BUL1/2+*  
 472 strain or cells lacking the arrestins *rod1Δ* or *bul1Δbul2Δ*, expressing UapA-Jen1 chimeras

473 tagged with GFP and expressed under a GAL promoter, were analysed by transport assays  
474 using radiolabelled xanthine (**A**), by epifluorescence microscopy (**B-D**) and by Western blot  
475 (**E-G**). Cells were grown overnight (O.N.) in YNB galactose (2 %, w/v) + glucose (0.1 %, w/v)  
476 medium until mid-exponential phase and glucose was added when indicated (Gal O.N. +  
477 Gluc 1 h and Gal O.N. + Gluc 2 h). At these time points, cells were visualized by Fluorescent  
478 Microscopy and protein extracts were prepared for Western immunoblotting with an anti-  
479 GFP antibody or anti-phosphoglycerate kinase (PGK) antibody (loading control). Transport  
480 assays are described in materials and methods and in (39).  $K_m$ , Michaelis-Menten constant;  
481 SE, standard error;  $V$ , relative % velocity.

482

### 483 **Dynamic transport-dependent interaction of N- and C-termini of Jen1**

484 Overall, our genetic and biochemical results strongly suggested that N- and C-  
485 termini of Jen1 contain elements critical for biogenesis, function and turnover of  
486 Jen1. Most notably, the effects of Jen1 cytosolic termini on Jen1 functional  
487 expression proved additive. This was highlighted by the significant stabilization of  
488 Jen1, when truncated at both tails, in comparison to what was found for the singly  
489 truncated versions. These results also suggest that the termini of Jen1 might interact  
490 with each other during the conformational changes accompanying transport activity,  
491 which is also associated to endocytic turnover. To further investigate this issue, we  
492 used a Bimolecular fluorescence (BiFC) assay, based on reconstitution of YFP  
493 fluorescence when the two parts of the split YFP epitope are fused in the two tails of  
494 Jen1 (YFPn-Jen1-YFPc). Given that reconstitution of YFP might in principle also  
495 occur in case Jen1 dimerizes, we also constructed a strain co-expressing the two  
496 parts of the split YFP epitope fused in distinct Jen1 molecules (i.e., Jen1-YFPn or  
497 Jen1-YFPc). These strains and relative controls (i.e., strains expressing Jen1-YFPn  
498 or Jen1-YFPc or co-expressing both) were used to investigate whether YFP is  
499 reconstituted in *cis* via interaction of the Jen1 tails, or/and in *trans* via dimerization of  
500 Jen1 molecules (for details of constructs see material and methods). **Figure 6A**  
501 shows that strong, PM-associated, reconstitution of YFP fluorescence occurs solely  
502 when the split epitope parts are fused with the tails of Jen1, whereas no fluorescent  
503 signal was obtained when these are fused in different Jen1 molecules. This result  
504 not only strongly suggests that the two tails of Jen1 come in close contact when  
505 attached in the same Jen1 molecule, but also points against tight dimerization of  
506 distinct Jen1 molecules, at least under the conditions tested. To address further the  
507 mechanism by which the two tails of Jen1 come into contact, we repeated our assay

508 in the presence of substrate. **Figure 6B** shows that the presence of lactic acid  
509 reduced significantly the YFP fluorescence signal over time (most evident at 30 min),  
510 while after prolonged incubation this was stabilized at a very low basal level (50 min).  
511 This finding suggests that stable reconstitution of YFP is transport-activity  
512 dependent, as the conformational movements accompanying translocation of the  
513 substrate should in principle affect the positioning of the two tails in the outward- and  
514 inward- facing topologies of Jen1. The transport-dependent interaction of N- and C-  
515 termini of Jen1 is very similar to what has been observed in members of an  
516 evolutionary, structurally, and functionally distinct transporter family, namely the  
517 NCS1/APC superfamily (33).

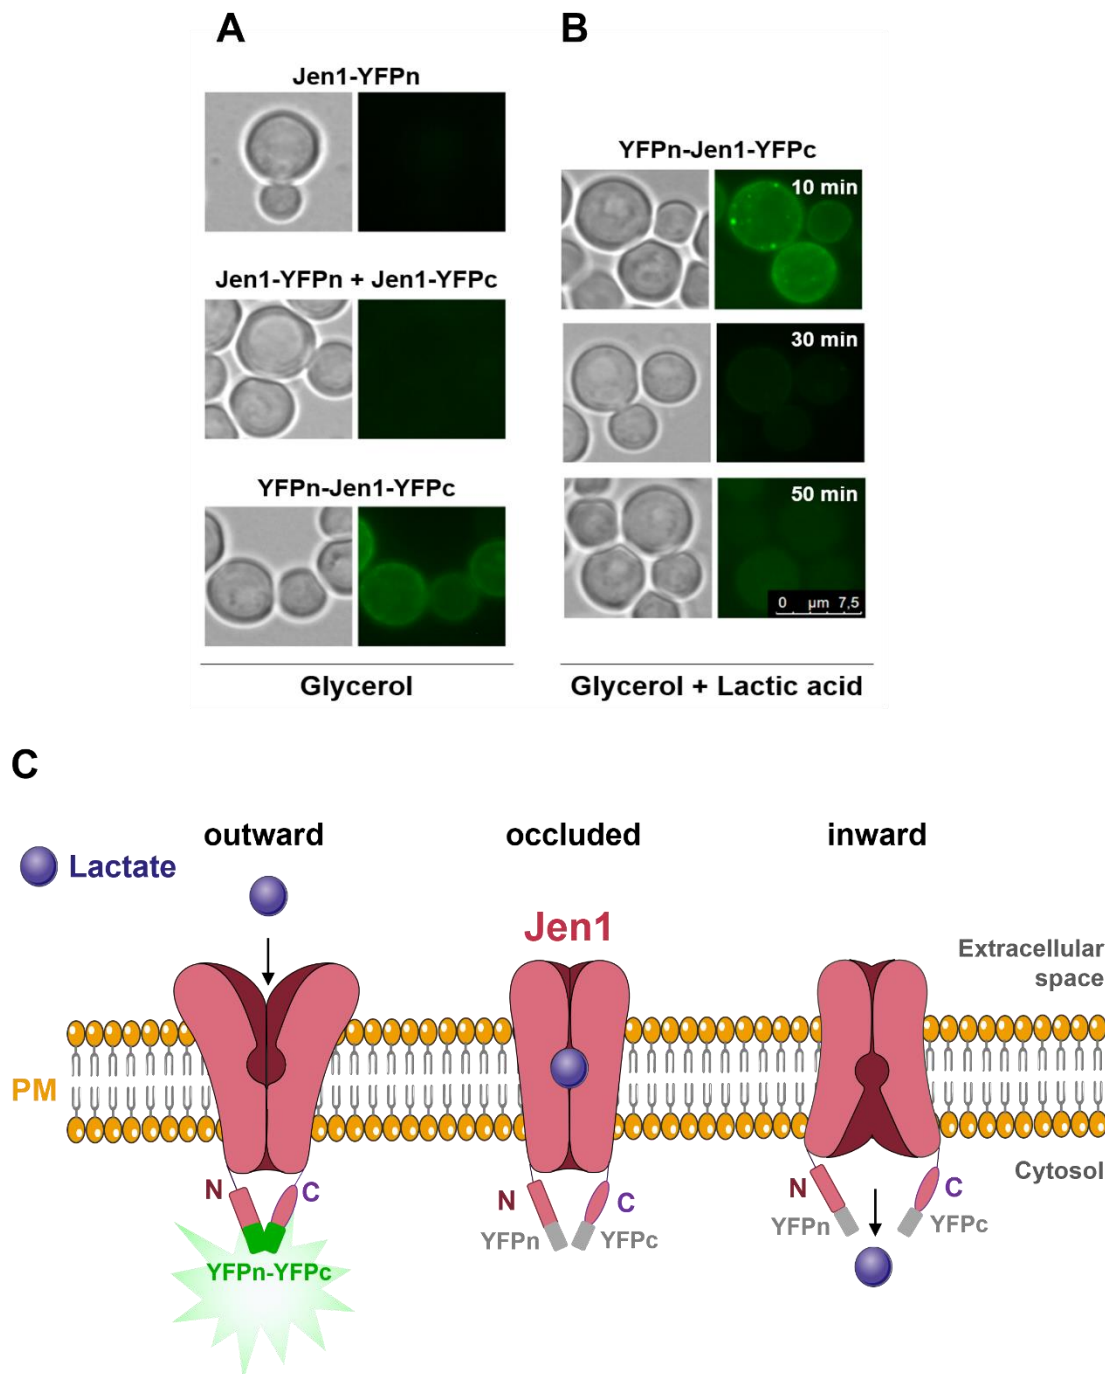

518  
519

**Figure 6 – The cytosolic termini of Jen1 come into close proximity in the absence of its substrate.** Cells of *S. cerevisiae* *jen1* $\Delta$  strain expressing YFPn-Jen1-YFPc, Jen1-YFPn, or co-expressing both Jen1-YFPn and Jen1-YFPc were analyzed by *in vivo* epifluorescence microscopy (for more details see Materials and Methods). **(A)** To induce Jen1 expression at the plasma membrane (PM), cells were grown in YNB 3 % (v/v) glycerol, until mid-exponential phase. **(B)** 0.5 % (v/v) lactic acid was added to cells previously grown in YNB 3 % (v/v) glycerol, until mid-exponential phase, and samples were collected over time for fluorescent microscopy analysis. **(C)** Schematic representation of the Jen1 transporter termini conformation during a substrate transport cycle (i.e., outward-facing, occluded,



528 inward-facing). In the absence of substrate, Jen1 is in an outward-facing conformation with  
529 the N- and C- termini in close contact or interacting with each other. Upon substrate addition,  
530 Jen1 moves to an inward conformation with consequent loss of termini interaction/proximity.  
531 The topological changes in Jen1 termini seem to be crucial for Jen1 endocytic turnover,  
532 biogenesis/folding, transport activity and trafficking. The aforementioned scheme represents  
533 a speculative *model* supported by our results.

534

## 535 **Discussion**

536 In the present work, we investigated possible functional roles of the terminal  
537 cytosolic segments of the Jen1 monocarboxylate transporter in *S. cerevisiae* (see  
538 **Table S2**). Our first approach consisted in designing, genetically constructing and  
539 functionally analysing truncated versions of GFP-tagged Jen1, lacking parts of their  
540 cytosolic termini, expressed in wild-type or mutant *S. cerevisiae* strains lacking the  
541 arrestins Rod1 or Bul1/2. Our functional analyses included Jen1-mediated growth  
542 tests on lactic acid, or effect on external pH, direct measurements of Jen1 transport  
543 kinetics using radiolabelled lactic acid, *in vivo* imaging of subcellular localization, and  
544 western blot measurements of protein steady state levels of the truncated Jen1  
545 versions. These constructs were expressed under induction conditions and in  
546 response to physiological signals triggering Jen1 endocytosis (i.e., glucose or  
547 prolonged growth on lactate).

548 Subsequently, we generated and analysed functional chimeric transporters made of  
549 UapA, a heterologous nucleobase-allantoin transporter of *A. nidulans*, fused with the  
550 terminal regions of Jen1.

551 Deleting the entire Jen1 terminal regions, which correspond to 133 N-terminal  
552 or 62 C-terminal amino acids, as defined by *in silico* predictions, led to non-functional  
553 Jen1 versions, which in most cases were associated with significant cellular  
554 mislocalization, mostly ER-retention. We thus proceeded by analysing shorter  
555 truncations, as those deleting the 94 N-terminal or/and the 33 C-terminal amino  
556 acids. Notice that similar truncated versions of Jen1 have been previously analysed  
557 (36), which allowed direct comparison of relevant results (see later). The shorter  
558 Jen1 truncations were proved to be functional based on growth tests and other  
559 functional assays, similarly to what has been reported in (36). Based on these Jen1

560 truncations and relative chimeras with UapA, we came to the following primary  
561 observations.

562 *Role of the C-tail.* Jen1 $\Delta$ CT33 is a stable version of Jen1, in all conditions  
563 tested, showing also increased *capacity* of lactate transport not only because of its  
564 higher concentration in the PM, but also due to 10-fold increased affinity for its  
565 substrate. This suggests that the segment of the C-terminal 33 amino acids deleted  
566 in the truncated version, contains not only a degron, as reported by Fujita et al  
567 (2018) (36), but also a functional motif that seems to affect the mechanism of  
568 transport of Jen1 in an ‘allosteric’ manner. This conclusion is based on the fact that  
569 although the structure of Jen1 is not known, but only predicted via homology  
570 modeling, its cytosolic C-tail is, in principle, distant from the proposed substrate  
571 translocation trajectory (43). A similar situation of regulation of transport kinetics by  
572 genetic modifications of the cytosolic C-tail has been reported for FurE, an *A.*  
573 *nidulans* nucleobase-allantoin transporter (32, 33). We also present evidence that  
574 the C-terminal 33 amino acid segment of Jen1 contains the major Rod1 interacting  
575 motif, as also reported in Fujita et al. (2018) (36), given that its deletion (i.e.,  $\Delta$ CT33)  
576 mimics the absence of glucose-triggered endocytosis of Jen1, observed in a *rod1*  
577 null mutant. Additionally, in the absence of Bul1/2, full endocytosis is observed in  
578 wild-type Jen1 and Jen1 $\Delta$ NT94, but not in Jen1 $\Delta$ CT33. Furthermore, we show that  
579 the interaction of Rod1 with the 33 amino acid C-terminal segment of Jen1 is *direct*  
580 and *context-independent*, because its transfer to the endocytosis-insensitive UapA  
581 proved sufficient to promote Rod1-dependent down-regulation, in the presence of  
582 glucose. Overall, our results concerning the C-terminal part of Jen1 confirm the  
583 conclusions presented in Fujita et al (2018), but further reveal two novel properties of  
584 this part of the transporter. First, the C-tail of Jen1 regulates the transport  
585 mechanism from a distance, and second, Rod1 recognizes a motif in the C-tail of  
586 Jen1 without the involvement of other regions of the transporter. To our knowledge  
587 there is no other report showing a context-independent interaction of a transporter  
588 motif with  $\alpha$ -arrestins.

589 When considering the fact that Jen1 $\Delta$ CT33 is stable and fully functional while  
590 Jen1 $\Delta$ CT62 is non-functional due to retention in the ER, we can also conclude that  
591 the middle part of the C-terminal segment, between amino acids residues 554-583  
592 (the areas missing in Jen1 $\Delta$ CT62 but present in Jen1 $\Delta$ CT33, **Figure S2**), might  
593 contain elements critical for ER-exit or proper folding. Such ER-exit motifs have been

594 identified at the cytosolic termini of other transporters but, to our knowledge, none  
595 has been rigorously shown to act in a context-independent manner (see the recent  
596 review (34). A preliminary *in silico* analysis of the sequence of Jen1 between amino  
597 acids residues 554-583 showed that a short di-acidic motif, <sup>577</sup>EYE<sup>579</sup> might be an  
598 interesting candidate as an ER-exit motif (see **Figure S2B**).

599 *Role of the N-tail.* Jen1 $\Delta$ NT94 was shown to be normally produced at basal  
600 levels, but proved to be a rather unstable version of Jen1, exhibiting rapid turnover  
601 upon further induction. Thus, the N-terminal 94 residue segment of Jen1 should  
602 include elements critical for post-translational stability, evident upon translocation to  
603 the PM. Interestingly, Jen1 $\Delta$ NT94 showed moderately altered transport kinetics  
604 (e.g., 2.5-fold increased substrate affinity), which points to a positive 'distant' effect  
605 on the transport mechanism, albeit weaker than that of the C-terminal segment.  
606 Notably also, the N-terminal part proved critical for endocytic down-regulation in  
607 response to prolonged growth on lactate or glucose, because when *ROD1* gene was  
608 knocked-out or the C-tail of Jen1 was deleted (i.e., no Rod1 binding), the presence  
609 of the N-terminal conferred partial endocytosis, while its absence led to an increased  
610 stability. Our data further support the conclusion that glucose triggered endocytosis  
611 of Jen1 is exerted via Bul1/2 binding to the N-terminal segment, as endocytosis  
612 without the C-terminal region (Jen1 $\Delta$ CT33) or without an active *ROD1*, depends  
613 solely on Bul1/2.

614 When the NT94 segment of Jen1 was transferred to UapA, it led to a chimera  
615 that showed significant ER-retention, despite being transport-competent. As a result,  
616 the functional analysis of this chimera did not provide us with additional evidence on  
617 the role the Jen1 N-tail. Finally, comparing the effect of deleting the entire N-terminal  
618 cytosolic region of Jen1 (residues 1-133), which led to ER-retention, to Jen1 $\Delta$ NT94,  
619 which led to turnover after translocation to the PM, we conclude that the segment  
620 between 94-133 might also include motifs driving ER-exit or necessary for proper  
621 folding. Interestingly, this Jen1 segment contains a well-conserved motif,  
622 <sup>126</sup>NPIPE<sup>133</sup>, that is worthy to be studied by mutational analysis, in the future (see  
623 **Figure S2B**).

624 *Dynamic interactions of the N- and C-tails of Jen1.* A clear conclusion  
625 concerning the tails of Jen1 is that both are needed for maximal glucose triggered  
626 endocytosis of Jen1, with the N-tail interacting with Bul1/2 and the C-tail with Rod1.  
627 The interaction of Rod1 with the C-tail seems to result in a stronger Jen1

628 endocytosis when Bul1 interaction with the N-tail is blocked, while the interaction of  
629 Bul1/2 with the N-tail confers only partial endocytosis, when Rod1 interaction with  
630 the C-tail is genetically abolished. To our opinion, however, the most interesting  
631 novel finding of this work concerns the evidence supporting the conclusion that the  
632 two Jen1 termini co-operate in regulating the stability and function of Jen1. A first  
633 genetic indication supporting this idea came from the doubly truncated Jen1 version,  
634 which showed exceptional new properties, other than those of the singly truncated  
635 mutants. More specifically, Jen1 $\Delta$ CT33 $\Delta$ NT94 shows very high PM stability, under  
636 all conditions and genetic backgrounds tested, displaying a transport kinetics distinct  
637 from the single truncations and the wild-type Jen1. Thus, the doubly truncated Jen1  
638 version is a 'new' monocarboxylate transporter that is endocytosis 'resistant' and that  
639 has an increased substrate affinity relative to the wild-type Jen1.

640 To address the molecular basis underlying the additive functional roles of  
641 Jen1 tails, we employed a BiFC assay, which showed a dynamic and transport-  
642 dependent interaction of the two tails of Jen1. Using the same assay, we also  
643 obtained strong evidence that Jen1 does not form dimers, at least in the conditions  
644 tested, which proved fortuitous for more rigorously interpreting the positive BiFC  
645 signals obtained when the two parts of split YFP were cloned in the same Jen1  
646 molecule. The only other previously reported case where BiFC assays showed that  
647 cytosolic tails interact to control the function and turnover of a transporter, is that of  
648 FurE in *A. nidulans* (32, 33). In this case, interactions of the two tails affected the  
649 stability, trafficking, function and endocytosis of FurE, and surprisingly, substrate  
650 specificity. Preliminary Molecular Dynamic analysis has provided some hints on how  
651 cytosolic tails might have affected FurE functioning from a distance by modifying the  
652 opening and closing of outer and inner gates of the transporter (33). In the present  
653 work, Jen1 truncations did not seem to affect substrate specificity, but interestingly,  
654 all functional Jen1 truncations showed increased (2.5 to 10.0-fold) affinities for lactic  
655 acid transport, despite retaining wild-type  $V_m$  values (see **Figure 3**). The alteration in  
656  $K_m$  values reveals a modification in the capacity of Jen1 truncations to bind native  
657 substrates. In other words, similar to FurE, changes on the cytosolic tails of Jen1,  
658 distantly positioned from the substrate binding site, affect the mechanism of  
659 substrate selection and transport. How this is achieved in the case of Jen1 remains  
660 elusive, but constitutes an interesting point to be addressed in the future.

661 Finally, another interesting observation of this work concerns the finding that  
662 UapA-Jen1 chimeras are more massively translocated into the PM when cER-PM  
663 contacts are abolished. The molecular basis of this phenomenon is still unclear. In  
664 fact, we did not notice a general enhancement of sorting to the PM of wild-type Jen1  
665 when cER-PM contacts are abolished. It thus seems that vesicular trafficking of  
666 specific cargoes, such as the UapA-Jen1 chimeras, is enhanced when the cER is not  
667 in close proximity to the PM. This finding might prove extremely valuable for the  
668 expression of heterologous membrane proteins in yeast.

669 The present work on Jen1 also shows that rather cryptic roles of transporter  
670 cytosolic tails can be exploited to rationally modify transporter function, which will be  
671 valuable, not only for addressing basic mechanisms of solute transport, but also for  
672 serving as tools in biotechnological applications ((44), for a review see (8)). The  
673 generality of this concept is supported by the work on FurE and Jen1, representing  
674 the two major transport superfamilies, APC and MFS, but also several other reports  
675 directly or indirectly supporting the emergence of transporter tails as important  
676 functional elements (34).

677

## 678 **Supporting Information**

679 This article contains supporting information.

680

## 681 **Materials and Methods**

### 682 **Yeast strains and Growth conditions**

683 All the yeast strains used in this work are listed in **Table S3**. The strains *jen1Δ*,  
684 *rod1Δ*, *bul1Δbul2Δ* and *rod1Δbul1Δbul2Δ* were derived from the 23344c wild type  
685 strain (Laboratory collection). For BiFC analysis, a *jen1Δ* strain derived from W303-  
686 1A was used (Laboratory collection). Yeast cells were grown in a synthetic minimal  
687 medium with 0.67 % (w/v) yeast nitrogen base (Difco), supplemented to meet the  
688 auxotrophic requirements (YNB medium) or in yeast extract (1 %, w/v) and peptone  
689 (1 %, w/v) (YP medium). Solid media was prepared adding agar (2 % w/v) to the  
690 respective liquid media. Carbon sources utilized were glucose (2 %, w/v), lactic acid  
691 (0.5 %, v/v, pH 5.0), galactose (2 %, w/v) or glycerol (3 %, v/v). Growth was carried  
692 out at 30 °C. Cultures were harvested during the mid-log phase of growth. Glucose-  
693 grown cells were, then, centrifuged, washed twice in deionized water and cultivated  
694 into a fresh YNB medium with lactic acid (incubation time is indicated). For induction  
695 conditions of the GAL promoter, the YNB medium was supplemented with a  
696 complete mixture Drop-out–uracil + 40 adenine (Formedium). Cells were grown  
697 overnight (till an OD<sub>640</sub> of 1.2-1.8) in YNB medium with 2 % (w/v) glucose and then,  
698 after being washed twice in deionized water, they were transferred to YNB medium  
699 with 2 % (w/v) galactose at a starting OD<sub>640</sub> of 0.2. Alternatively, cells were grown  
700 overnight (till an OD<sub>640</sub> of 0.5) in YNB medium with 2 % (w/v) galactose (plus 0.1 %,  
701 w/v, glucose), as described by (39). Glucose (2 %, w/v) was added, when indicated.

702

### 703 **Bioinformatic tools**

704 The protein sequences were obtained in SGD (<http://www.yeastgenome.org>) and  
705 AspGD (<http://www.aspgd.org/>) databases. The secondary structures were predicted  
706 by TOPCONS (45). Tertiary structures were predicted by HHpred  
707 (<http://toolkit.tuebingen.mpg.de/hhpred>) and MODELLER software (46), as described  
708 previously (43, 47). The minimum number of residues predicted in this work for N- or  
709 C-terminus of Jen1 are listed in **Table S1**.

710

### 711 **Construction of transporter truncations and chimeras**

712 All constructions were performed by *in vivo* gap repair (48). Firstly, DNA fragments  
713 were amplified by PCR (Accuzyme DNA Polymerase, Bioline, or Supreme NZYProof

714 DNA Polymerase, Nzytech) with specific oligonucleotides (listed in **Table S4**) using  
715 yeast genomic DNA (unless it is clearly specified). The resulting PCR products were  
716 co-transformed with a linearized plasmid (digested with a specific restriction enzyme)  
717 in *S. cerevisiae* cells. All plasmids used and constructed are listed in **Table S5**.  
718 Specifically, for construction of *JEN1* termini truncated versions pGPDJEN1 $\Delta$ NT133,  
719 pGPDJEN1 $\Delta$ CT33, pGPDJEN1 $\Delta$ CT62, *JEN1* gene DNA fragments were amplified  
720 using the following oligonucleotides pairs, respectively: D-NTJEN1\_133 and  
721 RCTJEN1; D-CTJEN1\_33 and CYC1TERM; and D-CTJEN1\_62 and CYC1TERM.  
722 The resulting PCR products were co-transformed with the linearized plasmid  
723 pGPDJEN1. For pGPDJEN1 $\Delta$ NT94 and pGPDJEN1 $\Delta$ NT94 $\Delta$ CT33 constructions, the  
724 DNA fragments were amplified from pGPDJEN1 and pGPDJEN1 $\Delta$ CT33,  
725 respectively, using the oligonucleotides Fw\_GPD\_jen1dNT94 and Rev\_GFP\_jen1.  
726 The resulting PCR products were co-transformed with the linearized plasmid  
727 p416GPD. For construction of *JEN1* termini truncated versions under the control of  
728 the GAL promoter: pGALJEN1 $\Delta$ CT33, pGALJEN1 $\Delta$ NT94 and  
729 pGPDJEN1 $\Delta$ NT94 $\Delta$ CT33, the GAL DNA fragment was amplified from pGALJEN1  
730 with the oligonucleotides GPDfwd and GALrev for pGALJEN1 $\Delta$ CT33 construction or  
731 with the oligonucleotides GPDfw\_new and GALrev\_dNT94 for constructions  
732 pGALJEN1 $\Delta$ NT94 and pGPDJEN1 $\Delta$ NT94 $\Delta$ CT33. The resulting GAL PCR product  
733 were co-transformed with the respective linearized plasmid (pGPDJEN1 $\Delta$ CT33,  
734 pGPDJEN1 $\Delta$ NT94 or pGPDJEN1 $\Delta$ NT94 $\Delta$ CT33). For the construction of  
735 pGALUAPA/*JEN1*CT33, the *GALUAPA* DNA fragment was amplified from  
736 pDDGFP2UAPA using the primers 381 and UapA\_rev\_33; the *JEN1*CT33 DNA  
737 fragment was amplified from pDDGFP2UAPA $\Delta$ CT/*JEN1*CT62 using the primers  
738 Jen1\_fw\_ct33 and 317. These DNA fragments were then co-transformed with  
739 linearized p426GPD plasmid previously digested with *SacI* and *XhoI* restriction  
740 enzymes to remove the GPD promoter. For the constructions of  
741 pGALUAPA/*JEN1*NT94, the *GALJEN1*NT94 DNA fragment was amplified from  
742 pGALJEN1 using the primers 381 and REV\_Jen1\_UapA; the *UAPAGFP* DNA  
743 fragment was amplified from pDDGFP2UAPA using the primers FW\_UapA\_Jen1  
744 and 317. These DNA fragments were then co-transformed with linearized p426GPD  
745 plasmid previously digested with *SacI* and *XhoI* restriction enzymes to remove the  
746 GPD promoter. For the constructions of pGALUAPA/*JEN1*NT94-CT33,  
747 *GALJEN1*NT94 DNA fragment was amplified from pGALJEN1 using the primers 381

748 and REV\_Jen1\_UapA; the *UAPA/JEN1CT33GFP* DNA fragment was amplified from  
749 pGALUAPA/JEN1CT33 using the primers FW\_UapA\_Jen1 and 317. These DNA  
750 fragments were then co-transformed with linearized p426GPD plasmid previously  
751 digested with *SacI* and *XhoI* restriction enzymes to remove the GPD promoter. The  
752 pDDGFP2JEN1 $\Delta$ CTJEN1CT62 plasmid was derived from pDDGFP2UAPA (Leung  
753 et al., 2010). Plasmid isolation from *S. cerevisiae* and *E. coli* strains was performed  
754 by standard protocols. Transformations were performed by the standard lithium  
755 acetate/polyethylene glycol method (49). All constructs were confirmed by DNA  
756 sequencing (GATC Biotech and MWG Eurofins).

757

### 758 **Transport assays**

759 Transport activity assays for Jen1 WT and Jen1 truncated transporters were  
760 performed as previously described (47) using radiolabelled D,L-[<sup>14</sup>C] lactic acid  
761 (Amersham Biosciences). Yeast cells were mid-exponentially grown in glucose and  
762 transferred to a fresh 0.5 % (v/v) lactate medium for 4h (Lac 4h). For uptake  
763 measurements, yeast cells were harvested in Lac 4h and centrifuged (5000 rpm, 2  
764 minutes). The samples were then washed twice with ice-cold deionized water and  
765 resuspended in ice-cold deionized water to a final concentration of about 20–40 mg  
766 dry weight/mL. The reaction mixtures were prepared in 1.5 mL tubes containing 60  
767  $\mu$ L of KH<sub>2</sub>PO<sub>4</sub> (0.1 M, pH 5.0), and 30  $\mu$ L of the yeast cell suspension. After  
768 incubation, the reaction was started by the addition of 10  $\mu$ L of 6 mM radiolabelled  
769 lactic acid, pH 5.0 0 (specific activity 2000 dpm/nmol), rapidly mixed by vortexing,  
770 and incubated for 1 min. After one minute, 100  $\mu$ L of 100 mM non-labelled substrate,  
771 was added, quickly mixed by vortexing and the mixture was chilled on ice, to stop the  
772 reaction. The reaction solutions were centrifuged for 5 min at 13200 rpm. The  
773 supernatant was rejected, and the pellet was resuspended in 1 mL of deionized cold  
774 water and centrifuged for 5 min, at 13200 rpm. The resulting pellet was resuspended  
775 in 1 mL of scintillation liquid (Opti-Phase HiSafe II; LKB FSA Laboratory Supplies).  
776 Radioactivity was measured in a Packard TRI-CARB 4810 TR liquid scintillation  
777 spectrophotometer with disintegrations per minute correction. The % uptake rate of  
778 wild-type Jen1 (Jen1 WT) is considered 100 %. The data is represented as a scatter  
779 plot with bar (mean and SD) (GraphPad Prism 8 software) of all data points obtained  
780 in three independent experiments. For kinetic assays the methodology used was the  
781 same as described above for transport activity assays. However, in this case, the



782 cells were exposed for 30 seconds to various concentrations of radiolabelled D, L-  
783 [<sup>14</sup>C] lactic acid, ranging from 0.03 to 2 mM. The data is represented as a Michaelis-  
784 Menten plot of the net initial velocity relative to increasing lactic acid concentrations,  
785 showing the mean values of at least three independent experiments. The error bars  
786 represent the standard deviation.  $K_m$  and  $V_{max}$  were determined using the GraphPad  
787 Prism 8. Transport activity assays for wild-type UapA and UapA-Jen1 chimeras were  
788 performed essentially as described in Leung et al., 2010, using radiolabelled [<sup>3</sup>H]-  
789 xanthine (21.1 Ci/mmol, Moravek Biochemicals, Brea, CA).

790

### 791 **Phenotypic growth tests**

792 Phenotypic growth assays on solid medium were performed according to (16, 43). A  
793 serial of 1:10 yeast cell dilutions (starting from an OD<sub>640</sub> of 1) were performed and 3  
794  $\mu$ L of each yeast suspension were plated in YNB solid medium, containing the  
795 desired carbon source. Cells were incubated at 30 °C or 18°C, for 4 or 7 days,  
796 respectively.

797

### 798 **Epifluorescence microscopy**

799 Yeast cells were grown, as described above, and visualized by fluorescent  
800 microscopy. A volume of 1 mL of growing yeast cells was collected and concentrated  
801 by a factor of 10. 5  $\mu$ L of each sample was then directly visualized, without fixation,  
802 on a Leica DM5000B microscope with appropriate filters. The resulting images were  
803 acquired with a Leica DFC 350FX R2 digital camera using the LAS AF software.  
804 Images were then processed in the Adobe Photoshop CC 2018 (Adobe Systems).

805

### 806 **Measurement of yeast culture pH**

807 The pH of the culture medium was determined as previously described (16). A  
808 volume of 1 mL of cell culture was harvested and the pH value was immediately  
809 measured by a pHmeter (Braun). The data is represented as an interleaved scatter  
810 plot (mean and SD) (GraphPad Prism 8 software) of at least three independent  
811 experiments.

812

### 813 **Western blot analysis**

814 Yeast cells were grown as above- mentioned and crude protein extracts were  
815 prepared as previously described (50). Nitrocellulose membranes (GE Healthcare

816 Life Sciences) were probed with anti-GFP (clones 7.1 and 13.1, Roche) and anti-  
817 PGK (yeast 3-phosphoglycerate kinase, Invitrogen) antibodies, used at 1:3000 and  
818 1:10000 dilutions, respectively. Primary antibodies were detected with horseradish  
819 peroxidase-conjugated anti-mouse immunoglobulin G (Sigma) by enhanced  
820 chemiluminescence.

821

### 822 **For bimolecular fluorescence complementation (BiFC) assay**

823 For BiFC analyses, several plasmid constructions were performed (**Table S4**):  
824 pGPDJEN1YFP<sub>N</sub> (URA3), pGPDJEN1YFP<sub>C</sub> (HIS3), pGPDYFP<sub>N</sub>JEN1YFP<sub>C</sub> (URA3),  
825 pGPDYFP<sub>N</sub> (URA3) and pGPDYFP<sub>C</sub> (URA3), using a GAP repair cloning strategy.  
826 The N-terminal half of the yellow fluorescent protein (YFP<sub>N</sub>; 154 AA residues of  
827 YFP), and the C-terminal half of YFP (YFP<sub>C</sub>; 86 AA residues of YFP) were amplified  
828 from plasmids PDV7 and PDV8 (51), respectively. *JEN1* ORF was amplified from  
829 pGPDJEN1 plasmid. The primers used are listed in **Table S3**.

830 To study the possible interaction of the Jen1 N- with C- terminus, *jen1Δ* cells  
831 expressing pGPDYFP<sub>N</sub>JEN1YFP<sub>C</sub> were grown overnight in glycerol (3 %, v/v) and  
832 ethanol (1 %, v/v), supplemented with the required auxotrophies, until mid-  
833 exponential phase, to induce Jen1 expression at the PM. Then, a pulse of lactate  
834 (0.5 %, v/v) was added, and fluorescent images were acquired at the indicated time  
835 points. Cells co-expressing pGPDJEN1YFP<sub>N</sub> (URA3) and pGPDJEN1YFP<sub>C</sub> (HIS3) or  
836 expressing pGPDYFP<sub>N</sub> (URA3) or pGPDYFP<sub>C</sub> (URA3), were used as controls.

837

## 838 **Acknowledgments**

839 We thank Olivier Vincent and Bruno André for fruitful discussions. This work was  
840 supported by the strategic programme UID/BIA/04050/2013 (POCI-01-0145-FEDER-  
841 007569) and the project PTDC/BIA-MIC/5246/2020 funded by national funds through  
842 the FCT I.P. and by the ERDF through the COMPETE 2020 - Programa Operacional  
843 Competitividade e Internacionalização (POCI). GD was supported by "Fondation  
844 Sante". CBA and GT acknowledge FCT for the PD/BD/135208/2017 and  
845 SFRH/BD/86221/2012 PhD grants, respectively.

846

## 847 **Conflict of Interest**

848 The authors declare that they have no conflicts of interest with the contents of this  
849 article.

850

## 851 **References**

- 852 1. Morgan, B. J., Chai, S. Y., and Albiston, A. L. (2011) GLUT4 associated  
853 proteins as therapeutic targets for diabetes. *Recent Pat. Endocr. Metab.*  
854 *Immune Drug Discov.* **5**, 25–32
- 855 2. Sakrikar, D., Mazei-Robison, M. S., Mergy, M. A., Richtand, N. W., Han, Q.,  
856 Hamilton, P. J., Bowton, E., Galli, A., Veenstra-VanderWeele, J., Gill, M., and  
857 Blakely, R. D. (2012) Attention Deficit/Hyperactivity Disorder-Derived Coding  
858 Variation in the Dopamine Transporter Disrupts Microdomain Targeting and  
859 Trafficking Regulation. *J. Neurosci.* **32**, 5385–5397
- 860 3. Bowton, E., Saunders, C., Reddy, I. A., Campbell, N. G., Hamilton, P. J.,  
861 Henry, L. K., Coon, H., Sakrikar, D., Veenstra-VanderWeele, J. M., Blakely, R.  
862 D., Sutcliffe, J., Matthies, H. J. G., Erreger, K., and Galli, A. (2014) SLC6A3  
863 coding variant Ala559Val found in two autism probands alters dopamine  
864 transporter function and trafficking. *Transl. Psychiatry.* **4**, e464
- 865 4. Scheffner, M., and Kumar, S. (2014) Mammalian HECT ubiquitin-protein  
866 ligases: Biological and pathophysiological aspects. *Biochim. Biophys. Acta -*  
867 *Mol. Cell Res.* **1843**, 61–74
- 868 5. Gonzalez-Menendez, P., Hevia, D., Mayo, J. C., and Sainz, R. M. (2017) The

- 869 dark side of glucose transporters in prostate cancer: Are they a new feature to  
870 characterize carcinomas? *Int. J. cancer*. **142**, 2414–2424
- 871 6. Diallinas, G., and Martzoukou, O. (2019) Transporter membrane traffic and  
872 function: lessons from a mould. *FEBS J*. **286**, 4861–4875
- 873 7. Kahlhofer, J., Leon, S., Teis, D., and Schmidt, O. (2020) The  $\alpha$ -arrestin family  
874 of ubiquitin ligase adaptors links metabolism with selective endocytosis. *Biol.*  
875 *Cell*. **113**, 1–59
- 876 8. Barata-Antunes, C., Alves, R., Talaia, G., Casal, M., Gerós, H., Mans, R., and  
877 Paiva, S. (2021) Endocytosis of nutrient transporters in fungi: The ART of  
878 connecting signaling and trafficking. *Comput. Struct. Biotechnol. J*. **19**, 1713–  
879 1737
- 880 9. Lin, C. H., MacGurn, J. A., Chu, T., Stefan, C. J., and Emr, S. D. (2008)  
881 Arrestin-Related Ubiquitin-Ligase Adaptors Regulate Endocytosis and Protein  
882 Turnover at the Cell Surface. *Cell*. **135**, 714–725
- 883 10. Nikko, E., and Pelham, H. R. B. (2009) Arrestin-mediated endocytosis of yeast  
884 plasma membrane transporters. *Traffic*. **10**, 1856–1867
- 885 11. Gournas, C., Amillis, S., Vlanti, A., and Diallinas, G. (2010) Transport-  
886 dependent endocytosis and turnover of a uric acid-xanthine permease. *Mol.*  
887 *Microbiol*. **75**, 246–60
- 888 12. Becuwe, M., Herrador, A., Haguenaer-Tsapis, R., Vincent, O., and Léon, S.  
889 (2012) Ubiquitin-mediated regulation of endocytosis by proteins of the arrestin  
890 family. *Biochem. Res. Int*. **2012**, 1–12
- 891 13. Merhi, A., and Andre, B. (2012) Internal Amino Acids Promote Gap1 Permease  
892 Ubiquitylation via TORC1/Npr1/14-3-3-Dependent Control of the Bul Arrestin-  
893 Like Adaptors. *Mol. Cell. Biol*. **32**, 4510–4522
- 894 14. Karachaliou, M., Amillis, S., Evangelinos, M., Kokotos, A. C., Yalelis, V., and  
895 Diallinas, G. (2013) The arrestin-like protein ArtA is essential for ubiquitination  
896 and endocytosis of the UapA transporter in response to both broad-range and  
897 specific signals. *Mol. Microbiol*. **88**, 301–317

- 898 15. Becuwe, M., and Léon, S. (2014) Integrated control of transporter endocytosis  
899 and recycling by the arrestin-related protein Rod1 and the ubiquitin ligase  
900 Rsp5. *Elife*. **3**, 1–23
- 901 16. Talaia, G., Gournas, C., Saliba, E., Barata-Antunes, C., Casal, M., André, B.,  
902 Diallinas, G., and Paiva, S. (2017) The  $\alpha$ -Arrestin Bul1p Mediates Lactate  
903 Transporter Endocytosis in Response to Alkalinization and Distinct  
904 Physiological Signals. *J. Mol. Biol.* **429**, 3678–3695
- 905 17. O'Donnell, A. F., Apffel, A., Gardner, R. G., and Cyert, M. S. (2010)  $\alpha$ -Arrestins  
906 Aly1 and Aly2 Regulate Intracellular Trafficking in Response to Nutrient  
907 Signaling. *Mol. Biol. Cell.* **21**, 3552–3566
- 908 18. Novoselova, T. V., Zahira, K., Rose, R. S., and Sullivan, J. A. (2012) Bul  
909 proteins, a nonredundant, antagonistic family of ubiquitin ligase regulatory  
910 proteins. *Eukaryot. Cell.* **11**, 463–470
- 911 19. Yashiroda, H., Oguchi, T., Yasuda, Y., Toh-E, A., and Kikuchi, Y. (1996) Bul1,  
912 a new protein that binds to the Rsp5 ubiquitin ligase in *Saccharomyces*  
913 *cerevisiae*. *Mol. Cell. Biol.* **16**, 3255–3263
- 914 20. Alvarez, C. E. (2008) On the origins of arrestin and rhodopsin. *BMC Evol. Biol.*  
915 **8**, 1–13
- 916 21. Rauch, S., and Martin-Serrano, J. (2011) Multiple interactions between the  
917 ESCRT machinery and arrestin-related proteins: implications for PPXY-  
918 dependent budding. *J. Virol.* **85**, 3546–3556
- 919 22. Wu, N., Zheng, B., Shaywitz, A., Dagon, Y., Tower, C., Bellinger, G., J, C.-H.  
920 S., Wen, E., Asara, J., McGraw, T. E., Kahn, B. B., and Cantle, L. C. (2013)  
921 AMPK-dependent degradation of TXNIP upon energy stress leads to  
922 enhanced glucose uptake via GLUT1. *Mol Cell.* **49**, 1167–1175
- 923 23. Waldhart, A. N., Dykstra, H., Peck, A. S., Boguslawski, E. A., Madaj, B., Wen,  
924 J., Veldkamp, K., Hollowell, M., Zheng, B., Lewis, C., McGraw, T. E., and Wu,  
925 N. (2017) Phosphorylation of TXNIP by AKT Mediates Acute Influx of Glucose  
926 in Response to Insulin. *Cell Rep.* **19**, 2005–2013

- 927 24. Merhi, A., Gérard, N., Lauwers, E., Prévost, M., and André, B. (2011)  
928 Systematic mutational analysis of the intracellular regions of yeast Gap1  
929 permease. *PLoS One*. **6**, 1–12
- 930 25. Ghaddar, K., Merhi, A., Saliba, E., Krammer, E.-M., Prevost, M., and Andre, B.  
931 (2014) Substrate-Induced Ubiquitylation and Endocytosis of Yeast Amino Acid  
932 Permeases. *Mol. Cell. Biol.* **34**, 4447–4463
- 933 26. Crapeau, M., Merhi, A., and André, B. (2014) Stress conditions promote yeast  
934 Gap1 permease ubiquitylation and down-regulation via the arrestin-like bul and  
935 aly proteins. *J. Biol. Chem.* **289**, 22103–22116
- 936 27. Gournas, C., Saliba, E., Krammer, E.-M., Barthelemy, C., Prévost, M., and  
937 André, B. (2017) Transition of yeast Can1 transporter to the inward-facing  
938 state unveils an  $\alpha$ -arrestin target sequence promoting its ubiquitylation and  
939 endocytosis. *Mol. Biol. Cell.* **28**, 2819–2832
- 940 28. Guiney, E. L., Klecker, T., and Emr, S. D. (2016) Identification of the endocytic  
941 sorting signal recognized by the Art1-Rsp5 ubiquitin ligase complex. *Mol. Biol.*  
942 *Cell.* **27**, 4043–4054
- 943 29. Marchal, C., Haguenaer-Tsapis, R., and Urban-Grimal, D. (1998) A PEST-like  
944 sequence mediates phosphorylation and efficient ubiquitination of yeast uracil  
945 permease. *Mol. Cell. Biol.* **18**, 314–21
- 946 30. Marchal, C., Haguenaer-Tsapis, R., and Urban-Grimal, D. (2000) Casein  
947 kinase I-dependent phosphorylation within a PEST sequence and  
948 ubiquitination at nearby lysines signal endocytosis of yeast uracil permease. *J.*  
949 *Biol. Chem.* **275**, 23608–14
- 950 31. Keener, J. M., and Babst, M. (2013) Quality Control and Substrate-Dependent  
951 Downregulation of the Nutrient Transporter Fur4. *Traffic.* **14**, 412–427
- 952 32. Papadaki, G. F., Amillis, S., and Diallinas, G. (2017) Substrate specificity of the  
953 furE transporter is determined by cytoplasmic terminal domain interactions.  
954 *Genetics.* **207**, 1387–1400
- 955 33. Papadaki, G. F., Lambrinidis, G., Zamanos, A., Mikros, E., and Diallinas, G.

- 956 (2019) Cytosolic N- and C-Termini of the *Aspergillus nidulans* FurE  
957 Transporter Contain Distinct Elements that Regulate by Long-Range Effects  
958 Function and Specificity. *J. Mol. Biol.* **431**, 3827–3844
- 959 34. Mikros, E., and Diallinas, G. (2019) Tales of tails in transporters. *Open Biol.* **9**,  
960 1–17
- 961 35. Becuwe, M., Vieira, N., Lara, D., Gomes-Rezende, J., Soares-Cunha, C.,  
962 Casal, M., Haguenaue-Tsapis, R., Vincent, O., Paiva, S., and Léon, S. (2012)  
963 A molecular switch on an arrestin-like protein relays glucose signaling to  
964 transporter endocytosis. *J. Cell Biol.* **196**, 247–259
- 965 36. Fujita, S., Sato, D., Kasai, H., Ohashi, M., Tsukue, S., Takekoshi, Y., Gomi, K.,  
966 and Shintani, T. (2018) The C-terminal region of the yeast monocarboxylate  
967 transporter Jen1 acts as a glucose signal-responding degron recognized by  
968 the  $\alpha$ -arrestin Rod1. *J. Biol. Chem.* **293**, 10926–10936
- 969 37. Paiva, S., Vieira, N., Nondier, I., Haguenaue-Tsapis, R., Casal, M., and  
970 Urban-Grimal, D. (2009) Glucose-induced ubiquitylation and endocytosis of the  
971 yeast Jen1 transporter. Role of lysine 63-linked ubiquitin chains. *J. Biol. Chem.*  
972 **284**, 19228–19236
- 973 38. Diallinas, G. (2016) Dissection of Transporter Function: From Genetics to  
974 Structure. *Trends Genet.* **32**, 576–590
- 975 39. Leung, J., Karachaliou, M., Alves, C., Diallinas, G., and Byrne, B. (2010)  
976 Expression and purification of a functional uric acid-xanthine transporter  
977 (UapA). *Protein Expr. Purif.* **72**, 139–46
- 978 40. Soares-Silva, I., Schuller, D., Andrade, R. P., Baltazar, F., Cássio, F., and  
979 Casal, M. (2003) Functional expression of the lactate permease Jen1p of  
980 *Saccharomyces cerevisiae* in *Pichia pastoris*. *Biochem. J.* **376**, 781–787
- 981 41. Manford, A. G., Stefan, C. J., Yuan, H. L., MacGurn, J. A., and Emr, S. D.  
982 (2012) ER-to-Plasma Membrane Tethering Proteins Regulate Cell Signaling  
983 and ER Morphology. *Dev. Cell.* **23**, 1129–1140
- 984 42. Hovsepien, J., Albanèse, V., Becuwe, M., Ivashov, V., Teis, D., and Léon, S.

- 985 (2018) The yeast arrestin-related protein Bul1 is a novel actor of glucose-  
986 induced endocytosis. *Mol. Biol. Cell.* **33**, 1012–1020
- 987 43. Soares-Silva, I., Sá-Pessoa, J., Myriantopoulos, V., Mikros, E., Casal, M.,  
988 and Diallinas, G. (2011) A substrate translocation trajectory in a cytoplasm-  
989 facing topological model of the monocarboxylate/H(+) symporter Jen1p. *Mol.*  
990 *Microbiol.* **81**, 805–17
- 991 44. Kim, H., Lee, W. H., Galazka, J. M., Cate, J. H. D., and Jin, Y. S. (2014)  
992 Analysis of cellodextrin transporters from *Neurospora crassa* in  
993 *Saccharomyces cerevisiae* for cellobiose fermentation. *Appl. Microbiol.*  
994 *Biotechnol.* **98**, 1087–1094
- 995 45. Bernsel, A., Viklund, H., Hennerdal, A., and Elofsson, A. (2009) TOPCONS:  
996 Consensus prediction of membrane protein topology. *Nucleic Acids Res.* **37**,  
997 465–468
- 998 46. Šali, A., Potterton, L., Yuan, F., van Vlijmen, H., and Karplus, M. (1995)  
999 Evaluation of comparative protein modeling by MODELLER. *Proteins Struct.*  
1000 *Funct. Genet.* **23**, 318–326
- 1001 47. Soares-Silva, I., Paiva, S., Diallinas, G., and Casal, M. (2007) The conserved  
1002 sequence NXX[S/T]HX[S/T]QDXXXT of the lactate/pyruvate:H(+) symporter  
1003 subfamily defines the function of the substrate translocation pathway. *Mol.*  
1004 *Membr. Biol.* **24**, 464–74
- 1005 48. Ma, H., Kunes, S., Schatz, P. J., and Botstein, D. (1987) Plasmid construction  
1006 by homologous recombination in yeast. *Gene.* **58**, 201–16
- 1007 49. Gietz, R. D., and Woods, R. A. (2002) Transformation of yeast by lithium  
1008 acetate/single-stranded carrier DNA/polyethylene glycol method. *Methods*  
1009 *Enzymol.* **350**, 87–96
- 1010 50. Paiva, S., Vieira, N., Nondier, I., Haguenaer-Tsapis, R., Casal, M., and  
1011 Urban-Grimal, D. (2009) Glucose-induced ubiquitylation and endocytosis of the  
1012 yeast Jen1 transporter: role of lysine 63-linked ubiquitin chains. *J. Biol. Chem.*  
1013 **284**, 19228–36



1014 51. Zekert, N., Veith, D., and Fischer, R. (2010) Interaction of the *Aspergillus*  
1015 *nidulans* microtubule-organizing center (MTOC) component ApsB with  
1016 gamma-tubulin and evidence for a role of a subclass of peroxisomes in the  
1017 formation of septal MTOCs. *Eukaryot. Cell.* **9**, 795–805

1018
